# Supplementary material for: Multi-cancer risk stratification based on national health data: A retrospective modelling and validation study
Source: bioRxiv or medRxiv preprint supplement (doi:10.1101/2022.10.12.22280908), 2022-10-12

# Table of Contents

|                                                                                                     |          |
|-----------------------------------------------------------------------------------------------------|----------|
| <b>Supplementary Materials</b>                                                                      | <b>1</b> |
| Additional Methods                                                                                  | 2        |
| Danish Registries                                                                                   | 2        |
| Outcomes                                                                                            | 2        |
| Model Description                                                                                   | 2        |
| Validation and Evaluation                                                                           | 3        |
| Additional Figures and Tables                                                                       | 6        |
| ST1: Features overview.                                                                             | 6        |
| ST2: Additional metrics for the validation.                                                         | 7        |
| ST3: Model comparison.                                                                              | 8        |
| ST4: Kaplan Meier curve comparison of top risk quantiles between our predictions and age-sex alone. | 9        |
| ST5: Performance comparison to QCancer                                                              | 10       |
| ST6: Screening evaluation                                                                           | 11       |
| ST7: Baseline risk comparison to Age-sex model on the UK Biobank                                    | 13       |
| ST8: Proportional hazards assumption for the overall predictor.                                     | 14       |
| SF1: Age-sex adjusted concordance for the development data.                                         | 15       |
| SFC-X: Summary plots                                                                                | 15       |
| SFC1: Oesophagus                                                                                    | 16       |
| SFC2: Stomach                                                                                       | 17       |
| SFC3: Colorectal                                                                                    | 18       |
| SFC4: Liver                                                                                         | 19       |
| SFC5: Pancreas                                                                                      | 20       |
| SFC6: Lung                                                                                          | 21       |
| SFC7: Melanoma                                                                                      | 22       |
| SFC8: Breast                                                                                        | 23       |
| SFC9: Cervix Uteri                                                                                  | 24       |
| SFC10: Corpus Uteri                                                                                 | 25       |
| SFC11: Ovary                                                                                        | 26       |
| SFC12: Prostate                                                                                     | 27       |
| SFC13: Testis                                                                                       | 28       |
| SFC14: Kidney                                                                                       | 29       |
| SFC15: Bladder                                                                                      | 30       |
| SFC16: Brain                                                                                        | 31       |
| SFC17: Thyroid                                                                                      | 32       |
| SFC18: Non-hodgkin lymphoma                                                                         | 33       |
| SFC19: Multiple Myeloma                                                                             | 34       |
| SFC20: AML                                                                                          | 35       |

# Supplementary Materials

## Additional Methods

### Danish Registries

All registers are linkable through a unique personal identification number provided in the Central Person Registry (CPR). We use the Danish National Patients Registry (DNPR) <sup>65</sup>, a nationwide longitudinal register with data on hospital admissions (secondary care) across all of Denmark since 1977, to extract information on individual diagnoses.

The Danish Register of Causes of Death (DR) <sup>66</sup>, covering all citizens dying in Denmark since 1970, and the Danish Cancer Register (CR) <sup>67</sup>, collating cancer incidence across the Danish population from 1978 onwards, are used to supplement the information in the DNPR. Additionally, we have been using the BigTempHealth project to extract information about basic health factors through doctor notes from hospitals in Region Zealand and the Capital Region since September, 2004.

### Outcomes

As mentioned in the main text, we focus on 20 major organ sites along with the groupings in NORDCAN <sup>56</sup> including: Oesophagus (C15), Stomach (C16), Colorectal (C18-21), Liver (C22), Pancreas (C25), Lung (C33-34), Melanoma (C43), Kidney (C64), Bladder (C67), Brain (C71), Thyroid (C73), Non-Hodgkin Lymphoma (C82-86), Multiple Myeloma (C90), AML (C\*- 920, 924, 925, 926, 928, 930, 940, 942) for both sexes. Female-only cancers include: Breast (C50), Cervix Uteri (C53), Corpus Uteri (C54), and Ovary (C56). Male-only cancers include: Prostate (C61), Testis (C62).

Cancers are identified by an entry in either the DNPR (primary + secondary diagnosis), CR, or DR. If multiple cancers are reported within a 3-month time window, all the corresponding cancers in the time window are considered equally valid as the primary.

For cancers reported in the CR, we check the morphological codes for benign, in situ, and metastatic cancers which are considered invalid.

The 20 major organ sites are preferentially treated to the bag-of-cancer and death outcome. If multiple cancers are considered, the earliest date is used for both.

### Model Description

As mentioned we make use of the method developed in <sup>60</sup>. However, as there are 20 different cancer types of interest + 2 additional composite outcomes, we expand the approach to account for competing risks.

We fit 22 cause-specific Cox models on the development-train set of the Danish registries, censoring individuals when they transition to a competing state. The validate set is used to gauge some of the hyperparameters and for initial model evaluation and sensitivity assessment. The test set has not been part of any model derivation and is solely used for final model evaluations.

The cause specific hazard function  $\alpha_k(t) = \lim_{\Delta t \rightarrow 0} (\Delta t)^{-1} \mathcal{P}(T \leq t + \Delta t \mid T > t)$

for an event  $k$  can be written under the cox model as  $\alpha_k(t) = \alpha_{0k}(t) \exp\left[\sum_{k=1}^{22} \theta_k \mathbf{X}(t)\right]$ , where  $\theta_k$  are the model parameters and  $\mathbf{X}(t)$  are the time-varying covariates. The cause-specific cumulative hazard follows as  $A_k(t) = \int_0^t \alpha_k(u) \text{d}u$  and is estimated via Breslow's estimator<sup>61</sup>. The overall survival function from any of the possible competing causes follows as  $S(t) = \exp\left[-\sum_{k=1}^{22} A_k(t)\right]$ . We can then define the cumulative incidence function (CIF) as  $F_k(t) = \int_0^t \alpha_k(u) S(u) \text{d}u$ , incorporating the cause-specific hazards for each of the 22 event types<sup>68</sup>. The CIF forms the basis for most of your predictions. It should be noted that survival probabilities with internal time-varying covariates are ill-defined; we do assume here for simplicity that covariates stay constant over the prediction horizon.

For the final model specification, we used a StudentT(loc=0, scale=0.01) distribution with 1.5 degrees of freedom as prior and a lower rank(50) Multivariate-Normal distribution as the distributional family for stochastic variational inference. Overall, we use a batch size of 720 randomly selected individuals with a 1/20 ratio between events and non-events for each stochastic gradient descent update.

## Validation and Evaluation

In total, we compared 6 different settings per cancer. The full model prediction is compared to an age-sex model based on the estimates from Denmark. A similar evaluation but now with an age-sex model (age up to a quadratic term and interactions) fitted on the UK Biobank data itself. We assessed the compatibility of the age-sex models and generally, the models perform similarly based on the ROC-AUC. Additionally, we evaluated Spearman's rank correlation between the two scores and almost all show a  $\rho > 0.9$  except for Breast (0.62), Thyroid (0.74), and Melanoma (0.84) (supplementary table 7).

Testis and Cervix Uteri show a reversed correlation indicating a particular discordance between the underlying incidence curves.

Additionally, we evaluated the model improvements for incorporating the family history data and/or the health data (disease + basic health) individually. The combined predictor is assessed for the proportional hazards assumption (supplementary table 8).

Further, we stratify individuals based on their predicted risk of the top 1% quantile and assess the corresponding Kaplan-Meier (KM) curve. The KM curve is then compared to a corresponding age-sex-based stratification. We use the additionally fitted age-sex model for the UK Biobank. Differences between the KM curves are assessed through a simple Cox regression (Hazard Ratio) and Log-Rank tests (supplementary table 4, supplementary figure C1-20e). Calibration of our predictions is assessed for each decedentile of the risk score.

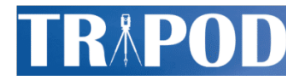

TRIPOD Checklist: Prediction Model Development

| Section/Topic                | Item | Checklist Item                                                                                                                                                                                        | Page                        |
|------------------------------|------|-------------------------------------------------------------------------------------------------------------------------------------------------------------------------------------------------------|-----------------------------|
| <b>Title and abstract</b>    |      |                                                                                                                                                                                                       |                             |
| Title                        | 1    | Identify the study as developing and/or validating a multivariable prediction model, the target population, and the outcome to be predicted.                                                          | p.1                         |
| Abstract                     | 2    | Provide a summary of objectives, study design, setting, participants, sample size, predictors, outcome, statistical analysis, results, and conclusions.                                               | p. 2                        |
| <b>Introduction</b>          |      |                                                                                                                                                                                                       |                             |
| Background and objectives    | 3a   | Explain the medical context (including whether diagnostic or prognostic) and rationale for developing or validating the multivariable prediction model, including references to existing models.      | p. 3-4                      |
|                              | 3b   | Specify the objectives, including whether the study describes the development or validation of the model or both.                                                                                     | p. 3                        |
| <b>Methods</b>               |      |                                                                                                                                                                                                       |                             |
| Source of data               | 4a   | Describe the study design or source of data (e.g., randomized trial, cohort, or registry data), separately for the development and validation data sets, if applicable.                               | p.4-5<br>24                 |
|                              | 4b   | Specify the key study dates, including start of accrual; end of accrual; and, if applicable, end of follow-up.                                                                                        | p. 4<br>fig. 1b             |
| Participants                 | 5a   | Specify key elements of the study setting (e.g., primary care, secondary care, general population) including number and location of centres.                                                          | p.4-5<br>24                 |
|                              | 5b   | Describe eligibility criteria for participants.                                                                                                                                                       | p. 5<br>fig. 1b             |
|                              | 5c   | Give details of treatments received, if relevant.                                                                                                                                                     | -                           |
| Outcome                      | 6a   | Clearly define the outcome that is predicted by the prediction model, including how and when assessed.                                                                                                | p.6<br>p. 24                |
|                              | 6b   | Report any actions to blind assessment of the outcome to be predicted.                                                                                                                                | p. 6                        |
| Predictors                   | 7a   | Clearly define all predictors used in developing or validating the multivariable prediction model, including how and when they were measured.                                                         | p.5-6<br>s. tab. 1          |
|                              | 7b   | Report any actions to blind assessment of predictors for the outcome and other predictors.                                                                                                            | p. 6                        |
| Sample size                  | 8    | Explain how the study size was arrived at.                                                                                                                                                            | p.5<br>fig. 1b              |
| Missing data                 | 9    | Describe how missing data were handled (e.g., complete-case analysis, single imputation, multiple imputation) with details of any imputation method.                                                  | p.5-6<br>s. tab. 1          |
| Statistical analysis methods | 10a  | Describe how predictors were handled in the analyses.                                                                                                                                                 | p.5-6<br>p. 25<br>s. tab. 1 |
|                              | 10b  | Specify type of model, all model-building procedures (including any predictor selection), and method for internal validation.                                                                         | p.5-7<br>p. 25              |
|                              | 10d  | Specify all measures used to assess model performance and, if relevant, to compare multiple models.                                                                                                   | p.6-7<br>p.25               |
| Risk groups                  | 11   | Provide details on how risk groups were created, if done.                                                                                                                                             | p.6-7<br>p.25               |
| <b>Results</b>               |      |                                                                                                                                                                                                       |                             |
| Participants                 | 13a  | Describe the flow of participants through the study, including the number of participants with and without the outcome and, if applicable, a summary of the follow-up time. A diagram may be helpful. | p. 5<br>fig. 1b             |
|                              | 13b  | Describe the characteristics of the participants (basic demographics, clinical features, available predictors), including the number of participants with missing data for predictors and outcome.    | tab. 1                      |
| Model development            | 14a  | Specify the number of participants and outcome events in each analysis.                                                                                                                               | tab. 1                      |
|                              | 14b  | If done, report the unadjusted association between each candidate predictor and outcome.                                                                                                              | online<br>m.                |



|                           |     |                                                                                                                                                                             |                 |
|---------------------------|-----|-----------------------------------------------------------------------------------------------------------------------------------------------------------------------------|-----------------|
| Model specification       | 15a | Present the full prediction model to allow predictions for individuals (i.e., all regression coefficients, and model intercept or baseline survival at a given time point). | online m.       |
|                           | 15b | Explain how to use the prediction model.                                                                                                                                    | online m.       |
| Model performance         | 16  | Report performance measures (with CIs) for the prediction model.                                                                                                            | p.7-10<br>fig 1 |
| <b>Discussion</b>         |     |                                                                                                                                                                             |                 |
| Limitations               | 18  | Discuss any limitations of the study (such as nonrepresentative sample, few events per predictor, missing data).                                                            | p. 10-11        |
| Interpretation            | 19b | Give an overall interpretation of the results, considering objectives, limitations, and results from similar studies, and other relevant evidence.                          | p. 10-11        |
| Implications              | 20  | Discuss the potential clinical use of the model and implications for future research.                                                                                       | p. 10-11        |
| <b>Other information</b>  |     |                                                                                                                                                                             |                 |
| Supplementary information | 21  | Provide information about the availability of supplementary resources, such as study protocol, Web calculator, and data sets.                                               | p.12            |
| Funding                   | 22  | Give the source of funding and the role of the funders for the present study.                                                                                               | p.2             |

We recommend using the TRIPOD Checklist in conjunction with the TRIPOD Explanation and Elaboration document.

# Additional Figures and Tables

## ST1: Features overview.

| Category              | Variable                                                                                            | Count | Encoding                 | Missingness                           | Transformations           | Data Sources      | Definition                |
|-----------------------|-----------------------------------------------------------------------------------------------------|-------|--------------------------|---------------------------------------|---------------------------|-------------------|---------------------------|
| <b>Disease codes:</b> |                                                                                                     |       |                          |                                       |                           |                   |                           |
|                       | Certain conditions originating in the perinatal period                                              | 59    | binary - (0, 1)          | ..                                    | ..                        | DNPR              | Cat.: 1712                |
|                       | Certain infectious and parasitic diseases                                                           | 173   | binary - (0, 1)          | ..                                    | ..                        | DNPR              | Cat.: 1712                |
|                       | Congenital malformations, deformations and chromosomal abnormalities                                | 87    | binary - (0, 1)          | ..                                    | ..                        | DNPR              | Cat.: 1712                |
|                       | Diseases of the blood and blood-forming organs and certain disorders involving the immune mechanism | 34    | binary - (0, 1)          | ..                                    | ..                        | DNPR              | Cat.: 1712                |
|                       | Diseases of the circulatory system                                                                  | 77    | binary - (0, 1)          | ..                                    | ..                        | DNPR              | Cat.: 1712                |
|                       | Diseases of the digestive system                                                                    | 72    | binary - (0, 1)          | ..                                    | ..                        | DNPR              | Cat.: 1712                |
|                       | Diseases of the ear and mastoid process                                                             | 24    | binary - (0, 1)          | ..                                    | ..                        | DNPR              | Cat.: 1712                |
|                       | Diseases of the eye and adnexa                                                                      | 47    | binary - (0, 1)          | ..                                    | ..                        | DNPR              | Cat.: 1712                |
|                       | Diseases of the genitourinary system                                                                | 82    | binary - (0, 1)          | ..                                    | ..                        | DNPR              | Cat.: 1712                |
|                       | Diseases of the musculoskeletal system and connective tissue                                        | 79    | binary - (0, 1)          | ..                                    | ..                        | DNPR              | Cat.: 1712                |
|                       | Diseases of the nervous system                                                                      | 68    | binary - (0, 1)          | ..                                    | ..                        | DNPR              | Cat.: 1712                |
|                       | Diseases of the respiratory system                                                                  | 64    | binary - (0, 1)          | ..                                    | ..                        | DNPR              | Cat.: 1712                |
|                       | Diseases of the skin and subcutaneous tissue                                                        | 72    | binary - (0, 1)          | ..                                    | ..                        | DNPR              | Cat.: 1712                |
|                       | Endocrine, nutritional and metabolic diseases                                                       | 74    | binary - (0, 1)          | ..                                    | ..                        | DNPR              | Cat.: 1712                |
|                       | Mental and behavioural disorders                                                                    | 78    | binary - (0, 1)          | ..                                    | ..                        | DNPR              | Cat.: 1712                |
|                       | Neoplasms                                                                                           | 48    | binary - (0, 1)          | ..                                    | ..                        | DNPR              | Cat.: 2000                |
|                       | Pregnancy, childbirth and the puerperium                                                            | 76    | binary - (0, 1)          | ..                                    | ..                        | DNPR              | Cat.: 1712                |
|                       | Symptoms, signs and abnormal clinical and laboratory findings, not elsewhere classified             | 91    | binary - (0, 1)          | ..                                    | ..                        | DNPR              | Cat.: 2000                |
| <b>Genealogy:</b>     |                                                                                                     |       |                          |                                       |                           |                   |                           |
|                       | Family case                                                                                         | 20    | categorical - (-1, 0, 1) | Effect coding; missing = 0            | ..                        | CPR, DNPR, CR, DR | Cat.: 20107, 20110, 20111 |
|                       | Family case (1st degree relatives)                                                                  | 20    | categorical - (-1, 0, 1) | Effect coding; missing = 0            | ..                        | CPR, DNPR, CR, DR | Cat.: 20107, 20110, 20111 |
|                       | Early age (age <= 50 years)<br>Family case                                                          | 20    | categorical - (-1, 0, 1) | Effect coding; missing = 0            | ..                        | CPR, DNPR, CR, DR | ..                        |
|                       | Multiple family cases                                                                               | 20    | categorical - (-1, 0, 1) | Effect coding; missing = 0            | ..                        | CPR, DNPR, CR, DR | Cat.: 20107, 20110, 20111 |
| <b>Basic Health:</b>  |                                                                                                     |       |                          |                                       |                           |                   |                           |
|                       | Alcoholic                                                                                           | 1     | categorical - (-1, 0, 1) | Effect coding; missing = 0            | ..                        | BTH, DNPR         | Cat.: 1558                |
|                       | Smoking                                                                                             | 1     | categorical - (-1, 0, 1) | Effect coding; missing = 0            | ..                        | BTH, DNPR         | Cat.: 20116               |
|                       | High blood pressure                                                                                 | 1     | categorical - (-1, 0, 1) | Effect coding; missing = 0            | ..                        | BTH, DNPR         | Cat.: 4079, 4080          |
|                       | Low blood pressure                                                                                  | 1     | categorical - (-1, 0, 1) | Effect coding; missing = 0            | ..                        | BTH, DNPR         | Cat.: 4079, 4080          |
|                       | Height                                                                                              | 1     | continuous (cm)          | Single mean imputation: (165f, 177m). | centered : 170 scaled:100 | BTH               | Cat.: 50                  |
|                       | Weight                                                                                              | 1     | continuous (kg)          | Single mean imputation: (69f, 82m).   | centered : 75 scaled:100  | BTH               | Cat.: 21002               |
|                       | Age at first birth                                                                                  | 1     | continuous (years)       | ..                                    | centered : - scaled:100   | CPR, DNPR         | Cat.: 2754                |

## ST2: Additional metrics for the validation.

|                   | <b>Cancer</b>        | <b>Concordance</b> | <b>s.d.</b> | <b>AUC</b> | <b>Brier score</b> |
|-------------------|----------------------|--------------------|-------------|------------|--------------------|
| <b>Denmark</b>    | Oesophagus           | 0.891              | 0.003       | 0.889      | 0.000              |
|                   | Stomach              | 0.854              | 0.004       | 0.852      | 0.000              |
|                   | Colorectal           | 0.846              | 0.001       | 0.845      | 0.002              |
|                   | Liver                | 0.905              | 0.004       | 0.903      | 0.000              |
|                   | Pancreas             | 0.859              | 0.003       | 0.857      | 0.000              |
|                   | Lung                 | 0.887              | 0.001       | 0.885      | 0.002              |
|                   | Melanoma             | 0.702              | 0.003       | 0.703      | 0.001              |
|                   | Breast               | 0.751              | 0.002       | 0.753      | 0.005              |
|                   | Cervix Uteri         | 0.656              | 0.007       | 0.659      | 0.000              |
|                   | Corpus Uteri         | 0.850              | 0.003       | 0.849      | 0.001              |
|                   | Ovary                | 0.787              | 0.005       | 0.786      | 0.001              |
|                   | Prostate             | 0.890              | 0.001       | 0.890      | 0.004              |
|                   | Testis               | 0.682              | 0.008       | 0.691      | 0.000              |
|                   | Kidney               | 0.828              | 0.003       | 0.827      | 0.001              |
|                   | Bladder              | 0.892              | 0.003       | 0.890      | 0.000              |
|                   | Brain                | 0.752              | 0.006       | 0.751      | 0.000              |
|                   | Thyroid              | 0.716              | 0.008       | 0.718      | 0.000              |
|                   | Non-Hodgkin Lymphoma | 0.794              | 0.004       | 0.793      | 0.001              |
|                   | Multiple Myeloma     | 0.848              | 0.004       | 0.846      | 0.000              |
|                   | AML                  | 0.798              | 0.011       | 0.797      | 0.000              |
| Other             | 0.796                | 0.001              | 0.796       | 0.007      |                    |
| Death             | 0.886                | 0.001              | 0.887       | 0.008      |                    |
| <b>UK Biobank</b> | Oesophagus           | 0.742              | 0.014       | 0.739      | 0.001              |
|                   | Stomach              | 0.705              | 0.017       | 0.701      | 0.001              |
|                   | Colorectal           | 0.657              | 0.007       | 0.654      | 0.004              |
|                   | Liver                | 0.739              | 0.019       | 0.736      | 0.001              |
|                   | Pancreas             | 0.667              | 0.014       | 0.663      | 0.001              |
|                   | Lung                 | 0.781              | 0.007       | 0.779      | 0.003              |
|                   | Melanoma             | 0.573              | 0.011       | 0.570      | 0.002              |
|                   | Breast               | 0.571              | 0.006       | 0.571      | 0.011              |
|                   | Cervix Uteri         | 0.551              | 0.054       | 0.550      | 0.000              |
|                   | Corpus Uteri         | 0.623              | 0.015       | 0.622      | 0.002              |
|                   | Ovary                | 0.577              | 0.017       | 0.576      | 0.001              |
|                   | Prostate             | 0.660              | 0.005       | 0.658      | 0.013              |
|                   | Testis               | 0.740              | 0.096       | 0.737      | 0.000              |
|                   | Kidney               | 0.673              | 0.014       | 0.669      | 0.001              |
|                   | Bladder              | 0.758              | 0.009       | 0.755      | 0.002              |
|                   | Brain                | 0.587              | 0.019       | 0.584      | 0.001              |
|                   | Thyroid              | 0.660              | 0.027       | 0.661      | 0.000              |
|                   | Non-Hodgkin Lymphoma | 0.643              | 0.012       | 0.639      | 0.001              |
|                   | Multiple Myeloma     | 0.671              | 0.017       | 0.668      | 0.001              |
|                   | AML                  | 0.709              | 0.038       | 0.706      | 0.000              |
| Other             | 0.650                | 0.003              | 0.648       | 0.015      |                    |
| Death             | 0.791                | 0.004              | 0.790       | 0.009      |                    |

# ST3: Model comparison.

| Cancer     | Log-Likelihood       |               |             |             |             | P-Values (FWER-Corrected) |               |             |                   |                 |                  |       |
|------------|----------------------|---------------|-------------|-------------|-------------|---------------------------|---------------|-------------|-------------------|-----------------|------------------|-------|
|            | Base                 | Base + Health | Base + Gene | All         | UKB-AgeSex  | Base / All                | Base / Health | Base / Gene | Base+Health / All | Base+Gene / All | UKB-AgeSex / All |       |
| Denmark    | Oesophagus           | -20326.662    | -20097.864  | -20321.159  | -20093.123  | ..                        | 0.000         | 0.000       | 0.021             | 0.046           | 0.000            | ..    |
|            | Stomach              | -22039.178    | -21991.113  | -22033.892  | -21985.542  | ..                        | 0.000         | 0.000       | 0.025             | 0.019           | 0.000            | ..    |
|            | Colorectal           | -153697.350   | -153600.420 | -153620.910 | -153528.560 | ..                        | 0.000         | 0.000       | 0.000             | 0.000           | 0.000            | ..    |
|            | Liver                | -16547.177    | -15631.003  | -16546.814  | -15629.177  | ..                        | 0.000         | 0.000       | 0.901             | 0.560           | 0.000            | ..    |
|            | Pancreas             | -30025.035    | -29888.958  | -30024.890  | -29888.938  | ..                        | 0.000         | 0.000       | 0.901             | 0.901           | 0.000            | ..    |
|            | Lung                 | -131119.800   | -129100.720 | -131083.150 | -129041.760 | ..                        | 0.000         | 0.000       | 0.000             | 0.000           | 0.000            | ..    |
|            | Melanoma             | -82073.718    | -81856.785  | -81909.540  | -81708.856  | ..                        | 0.000         | 0.000       | 0.000             | 0.000           | 0.000            | ..    |
|            | Breast               | -160303.310   | -160980.800 | -160140.350 | -159937.230 | ..                        | 0.000         | 0.000       | 0.000             | 0.000           | 0.000            | ..    |
|            | Cervix Uteri         | -14084.641    | -14029.227  | -14052.087  | -13996.080  | ..                        | 0.000         | 0.000       | 0.000             | 0.000           | 0.000            | ..    |
|            | Corpus Uteri         | -24088.914    | -23882.060  | -24087.109  | -23881.203  | ..                        | 0.000         | 0.000       | 0.574             | 0.901           | 0.000            | ..    |
|            | Ovary                | -17526.526    | -17523.697  | -17524.498  | -17522.032  | ..                        | 0.179         | 0.238       | 0.485             | 0.635           | 0.316            | ..    |
|            | Prostate             | -128125.440   | -127932.410 | -127910.540 | -127718.150 | ..                        | 0.000         | 0.000       | 0.000             | 0.000           | 0.000            | ..    |
|            | Testis               | -14680.359    | -14661.843  | -14586.911  | -14577.004  | ..                        | 0.000         | 0.000       | 0.000             | 0.000           | 0.000            | ..    |
|            | Kidney               | -31369.039    | -31221.597  | -31369.031  | -31221.459  | ..                        | 0.000         | 0.000       | 0.901             | 0.901           | 0.000            | ..    |
|            | Bladder              | -24361.172    | -24232.996  | -24339.834  | -24210.174  | ..                        | 0.000         | 0.000       | 0.000             | 0.000           | 0.000            | ..    |
|            | Brain                | -19830.430    | -19707.512  | -19828.016  | -19705.472  | ..                        | 0.000         | 0.000       | 0.336             | 0.477           | 0.000            | ..    |
|            | Thyroid              | -15117.174    | -15010.054  | -15104.929  | -14998.389  | ..                        | 0.000         | 0.000       | 0.000             | 0.000           | 0.000            | ..    |
|            | Non-Hodgkin Lymphoma | -38351.686    | -38285.587  | -38350.698  | -38284.298  | ..                        | 0.000         | 0.000       | 0.901             | 0.867           | 0.000            | ..    |
|            | Multiple Myeloma     | -14756.177    | -14663.027  | -14756.030  | -14662.980  | ..                        | 0.000         | 0.000       | 0.901             | 0.901           | 0.000            | ..    |
|            | AML                  | -6470.858     | -6395.330   | -6468.353   | -6393.188   | ..                        | 0.000         | 0.000       | 0.302             | 0.423           | 0.000            | ..    |
| Other      | -415320.660          | -414354.960   | -415245.180 | -414287.250 | ..          | 0.000                     | 0.000         | 0.000       | 0.000             | 0.000           | ..               |       |
| Death      | -542139.070          | -521669.520   | -542094.930 | -521584.520 | ..          | 0.000                     | 0.000         | 0.000       | 0.000             | 0.000           | ..               |       |
| UK Biobank | Oesophagus           | -3531.5363    | -3503.0347  | -3530.8549  | -3502.4515  | -3520.8277                | 0.000         | 0.000       | 1.000             | 1.000           | 0.000            | 0.000 |
|            | Stomach              | -2768.6624    | -2758.5274  | -2768.4267  | -2758.3464  | -2765.9961                | 0.002         | 0.000       | 1.000             | 1.000           | 0.001            | 0.027 |
|            | Colorectal           | -18342.54     | -18307.128  | -18330.719  | -18294.988  | -18338.608                | 0.000         | 0.000       | 0.000             | 0.000           | 0.000            | 0.000 |
|            | Liver                | -2374.805     | -2321.8366  | -2373.8003  | -2320.9145  | -2370.1542                | 0.000         | 0.000       | 1.000             | 1.000           | 0.000            | 0.000 |
|            | Pancreas             | -4453.0337    | -4446.6233  | -4452.7434  | -4446.2871  | -4450.3698                | 0.060         | 0.020       | 1.000             | 1.000           | 0.019            | 0.691 |
|            | Lung                 | -13613.933    | -13218.56   | -13585.766  | -13197.524  | -13580.378                | 0.000         | 0.000       | 0.000             | 0.000           | 0.000            | 0.000 |
|            | Melanoma             | -8329.6242    | -8325.2196  | -8329.5261  | -8325.1243  | -8316.4255                | 0.522         | 0.147       | 1.000             | 1.000           | 0.147            | 1.000 |
|            | Breast               | -26872.947    | -26840.228  | -26839.827  | -26808.835  | -26866.537                | 0.000         | 0.000       | 0.000             | 0.000           | 0.000            | 0.000 |
|            | Cervix Uteri         | -390.77281    | -389.71526  | -390.211    | -389.1597   | -390.68294                | 1.000         | 1.000       | 1.000             | 1.000           | 1.000            | 1.000 |
|            | Corpus Uteri         | -4524.5095    | -4486.6616  | -4524.3545  | -4486.4278  | -4524.2196                | 0.000         | 0.000       | 1.000             | 1.000           | 0.000            | 0.000 |
|            | Ovary                | -3227.4494    | -3226.7124  | -3226.365   | -3225.8125  | -3225.0276                | 1.000         | 1.000       | 1.000             | 1.000           | 1.000            | 1.000 |
|            | Prostate             | -26920.688    | -26910.062  | -26893.111  | -26882.965  | -26896.436                | 0.000         | 0.000       | 0.000             | 0.000           | 0.000            | 0.000 |
|            | Testis               | -132.0101     | -126.92298  | -130.50462  | -125.3686   | -132.09463                | 0.067         | 0.073       | 1.000             | 1.000           | 0.069            | 0.061 |
|            | Kidney               | -4532.2661    | -4526.9541  | -4532.1961  | -4526.8798  | -4528.2026                | 0.224         | 0.058       | 1.000             | 1.000           | 0.058            | 1.000 |
|            | Bladder              | -7577.9878    | -7559.3102  | -7573.8966  | -7555.19    | -7562.0885                | 0.000         | 0.000       | 0.207             | 0.201           | 0.000            | 0.052 |
|            | Brain                | -2667.9257    | -2667.5505  | -2667.5118  | -2667.1313  | -2664.0967                | 1.000         | 1.000       | 1.000             | 1.000           | 1.000            | 1.000 |
|            | Thyroid              | -1196.4797    | -1180.7691  | -1195.4041  | -1179.6977  | -1187.8032                | 0.000         | 0.000       | 1.000             | 1.000           | 0.000            | 0.018 |
|            | Non-Hodgkin Lymphoma | -6684.3819    | -6670.0451  | -6684.3571  | -6670.0311  | -6678.2122                | 0.000         | 0.000       | 1.000             | 1.000           | 0.000            | 0.017 |
|            | Multiple Myeloma     | -3113.8281    | -3103.4745  | -3113.8099  | -3103.4495  | -3109.174                 | 0.002         | 0.000       | 1.000             | 1.000           | 0.000            | 0.160 |
|            | AML                  | -711.75173    | -694.54681  | -711.72603  | -694.40737  | -710.47767                | 0.000         | 0.000       | 1.000             | 1.000           | 0.000            | 0.000 |
| Other      | -75270.965           | -75222.28     | -75268.819  | -75220.573  | -75232.146  | 0.000                     | 0.000         | 0.980       | 1.000             | 0.000           | 0.001            |       |
| Death      | -42397.76            | -40780.501    | -42385.376  | -40774.579  | -42238.397  | 0.000                     | 0.000         | 0.000       | 0.000             | 0.000           | 0.000            |       |

Notes: Base := Breslow Estimate for the baseline hazard based on the Danish data, Health := Diseases + Basic health factors, UKB-AgeSex := Age-Sex model fitted on the UKB data.  
/ Indicates the different models that are tested against each other. FWER := Family-wise Error Rate

**ST4:** Kaplan Meier curve comparison of top risk quantiles between our predictions and age-sex alone.

| Cancer               | Denmark           |            |            |                   |         |                | UK Biobank        |            |            |                   |         |                |
|----------------------|-------------------|------------|------------|-------------------|---------|----------------|-------------------|------------|------------|-------------------|---------|----------------|
|                      | Hazard Ratio (HR) | HR - lower | HR - upper | LogRank Statistic | P-Value | P-Value (FWER) | Hazard Ratio (HR) | HR - lower | HR - upper | LogRank Statistic | P-Value | P-Value (FWER) |
| Oesophagus           | 1.974             | 1.566      | 2.489      | 34.435            | 0.000   | 0.000          | 2.623             | 1.096      | 6.281      | 5.063             | 0.024   | 0.391          |
| Stomach              | 1.127             | 0.857      | 1.482      | 0.738             | 0.390   | 0.648          | 1.691             | 0.615      | 4.654      | 1.060             | 0.303   | 0.861          |
| Colorectal           | 0.975             | 0.874      | 1.088      | 0.208             | 0.648   | 0.648          | 1.171             | 0.729      | 1.879      | 0.427             | 0.513   | 0.861          |
| Liver                | 4.116             | 3.283      | 5.159      | 177.442           | 0.000   | 0.000          | 3.589             | 1.636      | 7.875      | 11.623            | 0.001   | 0.012          |
| Pancreas             | 1.659             | 1.314      | 2.095      | 18.509            | 0.000   | 0.000          | 1.534             | 0.627      | 3.752      | 0.891             | 0.345   | 0.861          |
| Lung                 | 2.404             | 2.175      | 2.658      | 314.215           | 0.000   | 0.000          | 4.266             | 2.800      | 6.499      | 54.207            | 0.000   | 0.000          |
| Melanoma             | 1.555             | 1.262      | 1.916      | 17.478            | 0.000   | 0.000          | 0.922             | 0.445      | 1.911      | 0.047             | 0.828   | 0.861          |
| Breast               | 1.326             | 1.139      | 1.544      | 13.345            | 0.000   | 0.003          | 1.945             | 1.235      | 3.064      | 8.550             | 0.003   | 0.062          |
| Cervix Uteri         | 1.196             | 0.589      | 2.426      | 0.246             | 0.620   | 0.648          | ..                | ..         | ..         | ..                | ..      | ..             |
| Corpus Uteri         | 2.615             | 1.941      | 3.521      | 43.207            | 0.000   | 0.000          | 6.895             | 2.385      | 19.938     | 17.174            | 0.000   | 0.001          |
| Ovary                | 1.369             | 0.915      | 2.048      | 2.354             | 0.125   | 0.625          | 3.316             | 0.345      | 31.883     | 1.213             | 0.271   | 0.861          |
| Prostate             | 1.255             | 1.117      | 1.409      | 14.803            | 0.000   | 0.001          | 1.287             | 0.854      | 1.938      | 1.463             | 0.226   | 0.861          |
| Testis               | 1.909             | 1.144      | 3.185      | 6.349             | 0.012   | 0.081          | ..                | ..         | ..         | ..                | ..      | ..             |
| Kidney               | 1.567             | 1.212      | 2.025      | 11.978            | 0.001   | 0.005          | 1.253             | 0.519      | 3.024      | 0.253             | 0.615   | 0.861          |
| Bladder              | 1.659             | 1.342      | 2.051      | 22.336            | 0.000   | 0.000          | 1.110             | 0.687      | 1.793      | 0.183             | 0.669   | 0.861          |
| Brain                | 2.446             | 1.643      | 3.641      | 20.764            | 0.000   | 0.000          | 1.427             | 0.453      | 4.497      | 0.373             | 0.541   | 0.861          |
| Thyroid              | 5.063             | 2.965      | 8.645      | 43.730            | 0.000   | 0.000          | 3.814             | 1.050      | 13.858     | 4.791             | 0.029   | 0.435          |
| Non-Hodgkin Lymphoma | 1.124             | 0.885      | 1.426      | 0.918             | 0.338   | 0.648          | 1.802             | 0.796      | 4.078      | 2.056             | 0.152   | 0.861          |
| Multiple Myeloma     | 1.827             | 1.285      | 2.596      | 11.618            | 0.001   | 0.006          | 1.452             | 0.553      | 3.814      | 0.579             | 0.447   | 0.861          |
| AML                  | 1.585             | 1.062      | 2.366      | 5.166             | 0.023   | 0.138          | 4.068             | 0.864      | 19.156     | 3.702             | 0.054   | 0.707          |
| Other                | 1.090             | 1.013      | 1.171      | 5.396             | 0.020   | 0.121          | 0.980             | 0.782      | 1.228      | 0.030             | 0.861   | 0.861          |
| Death                | 3.292             | 3.156      | 3.433      | 3468.066          | 0.000   | 0.000          | 4.618             | 3.841      | 5.552      | 320.842           | 0.000   | 0.000          |

## ST5: Performance comparison to QCancer

| Cancer               | Ours - ROC-AUC | QCancer - ROC-AUC |       |
|----------------------|----------------|-------------------|-------|
|                      |                | Female            | Male  |
| Oesophagus           | 0.889          | 0.863             | 0.856 |
| Stomach              | 0.852          | ..                | ..    |
| Colorectal           | 0.845          | 0.841             | 0.851 |
| Liver                | 0.903          | ..                | ..    |
| Pancreas             | 0.857          | 0.865             | 0.851 |
| Lung                 | 0.885          | 0.9               | 0.901 |
| Melanoma             | 0.703          | ..                | ..    |
| Breast               | 0.753          | 0.747             | ..    |
| Cervix Uteri         | 0.659          | ..                | ..    |
| Corpus Uteri         | 0.849          | 0.818             | ..    |
| Ovary                | 0.786          | 0.764             | ..    |
| Prostate             | 0.890          | ..                | 0.794 |
| Testis               | 0.691          | ..                | ..    |
| Kidney               | 0.827          | 0.849             | 0.856 |
| Bladder              | 0.890          | ..                | ..    |
| Brain                | 0.751          | ..                | ..    |
| Thyroid              | 0.718          | ..                | ..    |
| Non-Hodgkin Lymphoma | 0.793          | ..                | ..    |
| Multiple Myeloma     | 0.846          | ..                | ..    |
| AML                  | 0.797          | 0.798             | 0.79  |
| Other                | 0.796          | ..                | ..    |
| Death                | 0.887          | ..                | ..    |





| Cancer       | Age | Baseline |         |            |            |           |           |              |           |           | Population health informed screening |         |            |            |           |           |              |           |           |
|--------------|-----|----------|---------|------------|------------|-----------|-----------|--------------|-----------|-----------|--------------------------------------|---------|------------|------------|-----------|-----------|--------------|-----------|-----------|
|              |     | N        | Cancers | Age - mean | Age - s.d. | Age - q10 | Age - q25 | Age - median | Age - q75 | Age - q90 | N                                    | Cancers | Age - mean | Age - s.d. | Age - q10 | Age - q25 | Age - median | Age - q75 | Age - q90 |
| Oesophagus   | 55  | 67,266   | 24      | 57.93      | 1.36       | 55.98     | 56.85     | 58.21        | 58.85     | 59.69     | 67,266                               | 27      | 56.84      | 2.62       | 52.58     | 55.67     | 57.54        | 58.79     | 59.66     |
|              | 60  | 75,871   | 49      | 62.88      | 1.37       | 60.94     | 61.79     | 62.96        | 64.13     | 64.72     | 75,871                               | 57      | 61.06      | 3.60       | 56.19     | 59.63     | 61.88        | 63.88     | 64.61     |
| Oesophagus   | 65  | 98,019   | 93      | 67.64      | 1.43       | 65.48     | 66.55     | 67.63        | 68.88     | 69.38     | 98,019                               | 101     | 65.23      | 4.13       | 60.13     | 63.04     | 66.55        | 68.21     | 69.30     |
| Stomach      | 55  | 67,266   | 15      | 58.41      | 0.80       | 57.60     | 57.95     | 58.21        | 58.96     | 59.46     | 67,266                               | 18      | 57.27      | 2.40       | 53.56     | 56.88     | 58.04        | 58.77     | 59.33     |
|              | 60  | 75,871   | 37      | 62.72      | 1.54       | 60.46     | 61.55     | 62.63        | 64.13     | 64.73     | 75,871                               | 40      | 62.13      | 2.23       | 59.08     | 60.46     | 62.29        | 64.00     | 64.66     |
| Stomach      | 65  | 98,019   | 65      | 67.97      | 1.34       | 65.85     | 67.13     | 68.30        | 69.05     | 69.52     | 98,019                               | 80      | 66.45      | 3.07       | 62.04     | 64.82     | 67.47        | 68.74     | 69.39     |
| Colorectal   | 55  | 67,266   | 181     | 57.57      | 1.40       | 55.62     | 56.37     | 57.62        | 58.71     | 59.46     | 67,266                               | 190     | 57.29      | 1.76       | 55.03     | 56.12     | 57.54        | 58.71     | 59.38     |
|              | 60  | 75,871   | 233     | 62.66      | 1.43       | 60.64     | 61.38     | 62.79        | 63.96     | 64.55     | 75,871                               | 252     | 62.06      | 2.17       | 59.29     | 60.79     | 62.55        | 63.80     | 64.55     |
| Colorectal   | 65  | 98,019   | 430     | 67.58      | 1.37       | 65.72     | 66.46     | 67.59        | 68.72     | 69.47     | 98,019                               | 462     | 66.86      | 2.17       | 63.81     | 65.63     | 67.21        | 68.55     | 69.38     |
| Liver        | 55  | 67,266   | 21      | 57.97      | 1.22       | 56.29     | 57.12     | 58.46        | 58.71     | 59.13     | 67,266                               | 19      | 57.35      | 2.31       | 55.06     | 56.54     | 58.46        | 58.83     | 59.14     |
|              | 60  | 75,871   | 32      | 63.09      | 1.37       | 61.38     | 62.33     | 63.51        | 64.13     | 64.76     | 75,871                               | 38      | 61.04      | 3.52       | 56.20     | 58.58     | 62.46        | 63.86     | 64.46     |
| Liver        | 65  | 98,019   | 64      | 67.89      | 1.27       | 66.26     | 66.94     | 67.97        | 68.90     | 69.44     | 98,019                               | 79      | 65.26      | 4.26       | 58.68     | 63.59     | 66.88        | 68.68     | 69.16     |
| Pancreas     | 55  | 67,266   | 27      | 57.80      | 1.33       | 55.71     | 57.08     | 58.04        | 58.71     | 59.58     | 67,266                               | 30      | 57.09      | 2.17       | 53.63     | 56.04     | 57.50        | 58.58     | 59.55     |
|              | 60  | 75,871   | 57      | 62.97      | 1.19       | 60.85     | 62.55     | 63.21        | 63.88     | 64.26     | 75,871                               | 59      | 62.61      | 1.93       | 60.33     | 62.29     | 63.21        | 63.88     | 64.20     |
| Pancreas     | 65  | 98,019   | 119     | 67.73      | 1.35       | 65.78     | 66.80     | 67.88        | 68.80     | 69.47     | 98,019                               | 118     | 67.19      | 2.23       | 63.88     | 66.02     | 67.63        | 68.80     | 69.47     |
| Lung         | 55  | 67,266   | 77      | 57.84      | 1.43       | 55.56     | 56.71     | 58.21        | 58.88     | 59.63     | 67,266                               | 102     | 56.25      | 2.75       | 51.89     | 53.99     | 56.79        | 58.52     | 59.54     |
|              | 60  | 75,871   | 191     | 62.72      | 1.44       | 60.63     | 61.46     | 63.04        | 63.88     | 64.55     | 75,871                               | 245     | 60.73      | 3.52       | 55.07     | 58.79     | 61.71        | 63.55     | 64.38     |
| Lung         | 65  | 98,019   | 344     | 67.68      | 1.43       | 65.72     | 66.63     | 67.63        | 68.88     | 69.63     | 98,019                               | 492     | 65.10      | 3.92       | 60.13     | 63.04     | 65.96        | 68.05     | 69.30     |
| Breast       | 55  | 37,670   | 334     | 57.63      | 1.43       | 55.62     | 56.46     | 57.71        | 58.88     | 59.52     | 37,670                               | 366     | 56.56      | 2.59       | 52.50     | 55.04     | 57.04        | 58.79     | 59.46     |
|              | 60  | 42,413   | 491     | 62.61      | 1.45       | 60.55     | 61.38     | 62.71        | 63.88     | 64.63     | 42,413                               | 517     | 60.73      | 3.17       | 56.29     | 58.79     | 61.38        | 63.30     | 64.30     |
| Breast       | 65  | 54,118   | 686     | 67.51      | 1.35       | 65.59     | 66.46     | 67.55        | 68.55     | 69.38     | 54,118                               | 744     | 63.56      | 4.07       | 58.06     | 60.77     | 64.04        | 66.96     | 68.30     |
| Corpus Uteri | 55  | 37,670   | 56      | 57.51      | 1.44       | 55.63     | 56.12     | 57.46        | 58.81     | 59.42     | 37,670                               | 65      | 56.63      | 2.19       | 53.54     | 55.21     | 56.62        | 58.54     | 59.34     |
|              | 60  | 42,413   | 83      | 62.62      | 1.47       | 60.71     | 61.25     | 62.55        | 63.84     | 64.70     | 42,413                               | 98      | 60.88      | 2.89       | 56.18     | 58.85     | 61.17        | 63.17     | 64.55     |
| Corpus Uteri | 65  | 54,118   | 110     | 67.54      | 1.29       | 65.71     | 66.63     | 67.63        | 68.47     | 69.47     | 54,118                               | 144     | 64.77      | 3.88       | 58.69     | 62.52     | 65.67        | 67.88     | 68.83     |
| Ovary        | 55  | 37,670   | 36      | 58.02      | 1.41       | 55.71     | 56.91     | 58.42        | 59.23     | 59.63     | 37,670                               | 31      | 57.18      | 2.33       | 53.54     | 55.71     | 58.12        | 59.21     | 59.46     |
|              | 60  | 42,413   | 59      | 62.82      | 1.43       | 60.94     | 61.67     | 62.71        | 64.21     | 64.73     | 42,413                               | 52      | 62.15      | 2.28       | 59.06     | 60.75     | 62.59        | 64.09     | 64.79     |
| Ovary        | 65  | 54,118   | 82      | 67.40      | 1.39       | 65.39     | 66.11     | 67.47        | 68.30     | 69.37     | 54,118                               | 87      | 66.16      | 2.57       | 62.85     | 64.92     | 66.38        | 68.00     | 69.28     |
| Prostate     | 55  | 29,596   | 212     | 57.75      | 1.47       | 55.46     | 56.54     | 57.88        | 59.04     | 59.63     | 29,596                               | 222     | 57.50      | 1.77       | 54.87     | 56.37     | 57.75        | 59.04     | 59.63     |
|              | 60  | 33,458   | 381     | 62.82      | 1.39       | 60.71     | 61.71     | 62.88        | 64.04     | 64.72     | 33,458                               | 397     | 62.32      | 2.10       | 59.38     | 61.21     | 62.71        | 63.96     | 64.66     |
| Prostate     | 65  | 43,901   | 840     | 67.62      | 1.38       | 65.72     | 66.55     | 67.88        | 68.72     | 69.38     | 43,901                               | 829     | 66.83      | 2.43       | 63.45     | 65.55     | 67.47        | 68.63     | 69.38     |
| Kidney       | 55  | 67,266   | 31      | 57.71      | 1.56       | 55.54     | 56.46     | 57.79        | 59.08     | 59.79     | 67,266                               | 35      | 57.06      | 2.23       | 54.29     | 55.50     | 57.46        | 58.96     | 59.79     |
|              | 60  | 75,871   | 56      | 63.11      | 1.38       | 60.92     | 61.94     | 63.46        | 64.21     | 64.80     | 75,871                               | 64      | 61.68      | 3.22       | 56.33     | 59.88     | 63.34        | 63.90     | 64.69     |
| Kidney       | 65  | 98,019   | 127     | 67.76      | 1.29       | 65.82     | 66.96     | 67.88        | 68.76     | 69.47     | 98,019                               | 118     | 66.69      | 2.85       | 63.38     | 65.36     | 67.55        | 68.70     | 69.41     |
| Bladder      | 55  | 67,266   | 60      | 57.87      | 1.48       | 55.53     | 56.93     | 58.12        | 59.15     | 59.71     | 67,266                               | 61      | 57.60      | 1.79       | 55.21     | 56.62     | 57.88        | 59.13     | 59.71     |
|              | 60  | 75,871   | 85      | 62.75      | 1.41       | 60.66     | 61.71     | 62.71        | 64.04     | 64.68     | 75,871                               | 95      | 62.12      | 2.12       | 59.58     | 60.75     | 62.55        | 63.84     | 64.60     |
| Bladder      | 65  | 98,019   | 195     | 67.68      | 1.34       | 65.80     | 66.63     | 67.80        | 68.76     | 69.47     | 98,019                               | 207     | 67.13      | 2.02       | 64.35     | 65.96     | 67.47        | 68.72     | 69.47     |
| Brain        | 55  | 67,266   | 29      | 57.59      | 1.29       | 55.86     | 56.46     | 57.62        | 58.46     | 59.39     | 67,266                               | 27      | 57.41      | 1.57       | 55.24     | 56.29     | 57.62        | 58.58     | 59.49     |
|              | 60  | 75,871   | 43      | 62.70      | 1.45       | 60.88     | 61.55     | 62.46        | 64.09     | 64.72     | 75,871                               | 43      | 62.39      | 2.00       | 60.14     | 61.42     | 62.29        | 64.09     | 64.72     |
| Brain        | 65  | 98,019   | 64      | 67.48      | 1.28       | 65.57     | 66.53     | 67.51        | 68.40     | 69.19     | 98,019                               | 60      | 66.80      | 2.04       | 64.51     | 65.25     | 67.26        | 68.40     | 69.22     |
| NHL          | 55  | 67,266   | 52      | 58.03      | 1.45       | 55.88     | 56.77     | 58.25        | 59.29     | 59.79     | 67,266                               | 57      | 57.16      | 2.63       | 52.87     | 56.04     | 58.12        | 59.21     | 59.79     |
|              | 60  | 75,871   | 91      | 62.93      | 1.40       | 60.71     | 61.88     | 63.21        | 64.00     | 64.63     | 75,871                               | 94      | 61.69      | 2.97       | 58.26     | 60.15     | 62.50        | 63.88     | 64.63     |
| NHL          | 65  | 98,019   | 162     | 67.63      | 1.41       | 65.72     | 66.55     | 67.55        | 68.94     | 69.63     | 98,019                               | 171     | 66.42      | 3.28       | 62.46     | 65.25     | 67.30        | 68.68     | 69.63     |
| MM           | 55  | 67,266   | 29      | 57.37      | 1.34       | 55.46     | 56.29     | 57.54        | 58.37     | 59.39     | 67,266                               | 28      | 57.40      | 1.38       | 55.36     | 56.42     | 57.58        | 58.39     | 59.40     |
|              | 60  | 75,871   | 29      | 62.43      | 1.45       | 60.92     | 61.21     | 62.38        | 63.30     | 64.66     | 75,871                               | 29      | 62.17      | 1.84       | 59.46     | 61.04     | 62.38        | 63.30     | 64.66     |
| MM           | 65  | 98,019   | 98      | 67.61      | 1.40       | 65.52     | 66.57     | 67.72        | 68.70     | 69.49     | 98,019                               | 92      | 67.29      | 2.14       | 65.04     | 66.53     | 67.72        | 68.70     | 69.54     |
| AML          | 55  | 67,266   | 7       | 57.26      | 1.02       | 55.76     | 56.50     | 57.54        | 58.04     | 58.31     | 67,266                               | 8       | 56.96      | 1.24       | 55.46     | 55.77     | 57.37        | 57.96     | 58.28     |
|              | 60  | 75,871   | 13      | 62.68      | 1.31       | 60.89     | 62.29     | 62.71        | 63.55     | 64.26     | 75,871                               | 15      | 62.03      | 2.06       | 59.09     | 60.92     | 62.71        | 63.42     | 64.15     |
| AML          | 65  | 98,019   | 10      | 68.22      | 1.18       | 66.41     | 67.74     | 68.47        | 68.92     | 69.64     | 98,019                               | 17      | 65.23      | 3.84       | 59.96     | 62.96     | 65.96        | 68.47     | 69.28     |

## ST7: Baseline risk comparison to Age-sex model on the UK Biobank

| Cancer               | Spearman Corr. | Pvalue | AUC Breslow | AUC UKB-AgeSex |
|----------------------|----------------|--------|-------------|----------------|
| Oesophagus           | 0.964          | 0.000  | 0.715       | 0.722          |
| Stomach              | 0.986          | 0.000  | 0.682       | 0.687          |
| Colorectal           | 0.991          | 0.000  | 0.639       | 0.640          |
| Liver                | 0.977          | 0.000  | 0.701       | 0.701          |
| Pancreas             | 0.991          | 0.000  | 0.657       | 0.660          |
| Lung                 | 0.968          | 0.000  | 0.668       | 0.673          |
| Melanoma             | 0.836          | 0.000  | 0.577       | 0.591          |
| Breast               | 0.615          | 0.000  | 0.535       | 0.547          |
| Cervix Uteri         | -0.777         | 0.000  | 0.472       | 0.513          |
| Corpus Uteri         | 0.930          | 0.000  | 0.556       | 0.554          |
| Ovary                | 0.995          | 0.000  | 0.575       | 0.576          |
| Prostate             | 1.000          | 0.000  | 0.651       | 0.651          |
| Testis               | -0.494         | 0.000  | 0.528       | 0.509          |
| Kidney               | 0.938          | 0.000  | 0.668       | 0.675          |
| Bladder              | 0.998          | 0.000  | 0.751       | 0.751          |
| Brain                | 0.969          | 0.000  | 0.588       | 0.594          |
| Thyroid              | 0.734          | 0.000  | 0.620       | 0.663          |
| Non-Hodgkin Lymphoma | 0.959          | 0.000  | 0.629       | 0.634          |
| Multiple Myeloma     | 0.981          | 0.000  | 0.659       | 0.662          |
| AML                  | 0.933          | 0.000  | 0.624       | 0.639          |
| Other                | 0.993          | 0.000  | 0.652       | 0.654          |
| Death                | 0.926          | 0.000  | 0.695       | 0.709          |

**Notes:** Corr := Correlation, Breslow := Baseline hazard estimate based on Danish data, UKB-AgeSex := Age-Sex model fitted on UKB data

**ST8: Proportional hazards assumption for the overall predictor.**

|                   | Cancer           | PH-Assumption Test |         |
|-------------------|------------------|--------------------|---------|
|                   |                  | Chi2 Statistic     | P-value |
| <b>Denmark</b>    | Oesophagus       | 13.091             | 0.000   |
|                   | Stomach          | 10.060             | 0.002   |
|                   | Colorectal       | 8.734              | 0.003   |
|                   | Liver            | 0.833              | 0.361   |
|                   | Pancreas         | 4.667              | 0.031   |
|                   | Lung             | 0.317              | 0.573   |
|                   | Melanoma         | 0.087              | 0.769   |
|                   | Breast           | 1.433              | 0.231   |
|                   | Cervix Uteri     | 0.319              | 0.572   |
|                   | Corpus Uteri     | 2.875              | 0.090   |
|                   | Ovary            | 0.875              | 0.350   |
|                   | Prostate         | 121.108            | 0.000   |
|                   | Testis           | 1.310              | 0.252   |
|                   | Kidney           | 12.333             | 0.000   |
|                   | Bladder          | 2.121              | 0.145   |
|                   | Brain            | 6.961              | 0.008   |
|                   | Thyroid          | 0.040              | 0.841   |
|                   | Non-Hodgkin Lyr  | 5.575              | 0.018   |
|                   | Multiple Myeloma | 10.409             | 0.001   |
|                   | AML              | 0.008              | 0.928   |
|                   | Other            | 4.097              | 0.043   |
| Death             | 381.505          | 0.000              |         |
| <b>UK Biobank</b> | Oesophagus       | 2.015              | 0.156   |
|                   | Stomach          | 1.752              | 0.186   |
|                   | Colorectal       | 0.436              | 0.509   |
|                   | Liver            | 4.105              | 0.043   |
|                   | Pancreas         | 0.007              | 0.931   |
|                   | Lung             | 3.013              | 0.083   |
|                   | Melanoma         | 0.056              | 0.813   |
|                   | Breast           | 0.100              | 0.752   |
|                   | Cervix Uteri     | 0.004              | 0.949   |
|                   | Corpus Uteri     | 2.324              | 0.127   |
|                   | Ovary            | 2.209              | 0.137   |
|                   | Prostate         | 5.032              | 0.025   |
|                   | Testis           | 0.494              | 0.482   |
|                   | Kidney           | 3.881              | 0.049   |
|                   | Bladder          | 0.012              | 0.912   |
|                   | Brain            | 1.565              | 0.211   |
|                   | Thyroid          | 1.297              | 0.255   |
|                   | Non-Hodgkin Lyr  | 0.237              | 0.626   |
|                   | Multiple Myeloma | 0.697              | 0.404   |
|                   | AML              | 2.888              | 0.089   |
|                   | Other            | 0.985              | 0.321   |
| Death             | 67.945           | 0.000              |         |

**Notes:** PH := Proportional Hazards

## SF1: Age-sex adjusted concordance for the development data.

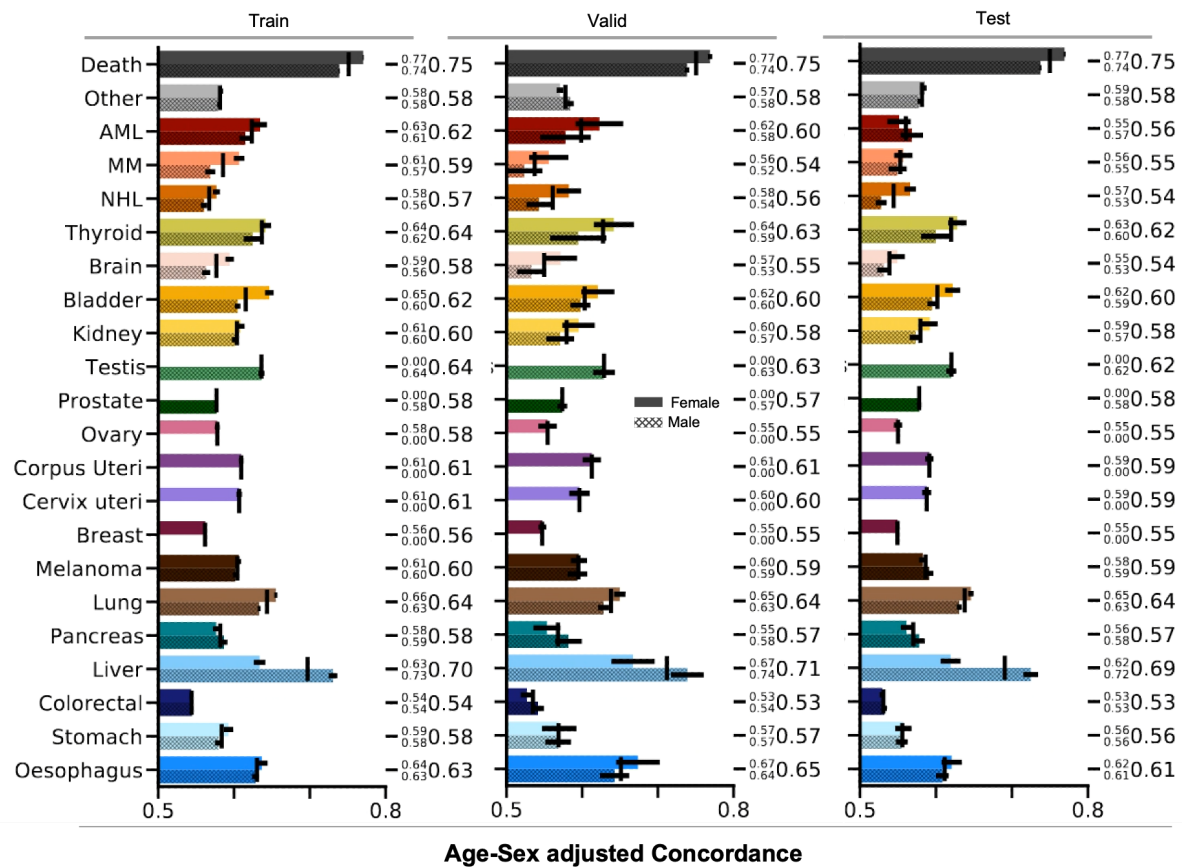

supplementary figure 1:

Concordance index for the development data on the Danish cohort.

## SFC-X: Summary plots

- Age-sex Incidence for the Danish and UKB cohort.
- Model estimates for underlying baseline risk.
- Forest plot based on HPD-90% – coloured for significant effects based on HPD-95%. A maximum of 30 associations are shown.
- ROC-AUC curve and calibration plot for each decentile.
- Kaplan-Meier curve for the top 1% risk quantile between our predictions and an Age-Sex baseline for the Danish and UKB cohort.
- Lower/Upper quantiles of the 5-Year absolute risk as evaluated on the Danish and UKB cohort.

# SFC1: Oesophagus

## Oesophagus

a.)

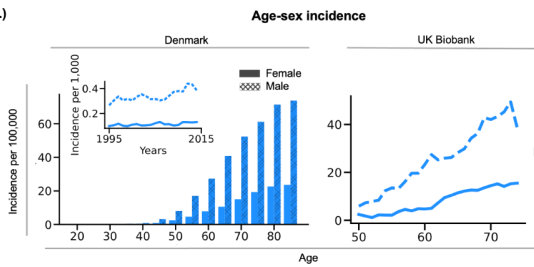

b.)

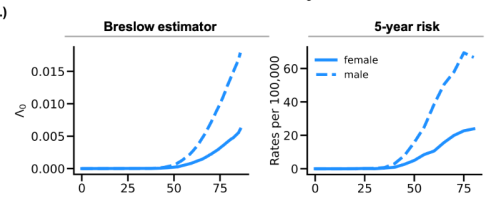

d.)

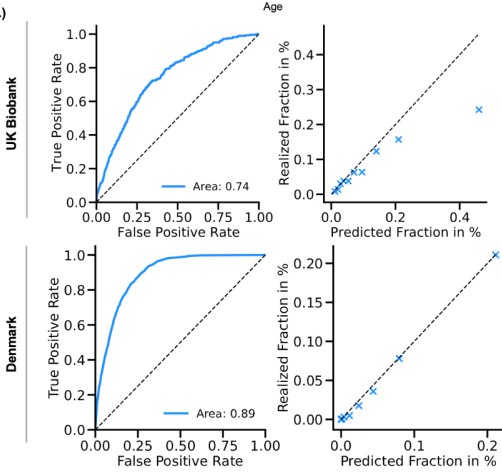

c.)

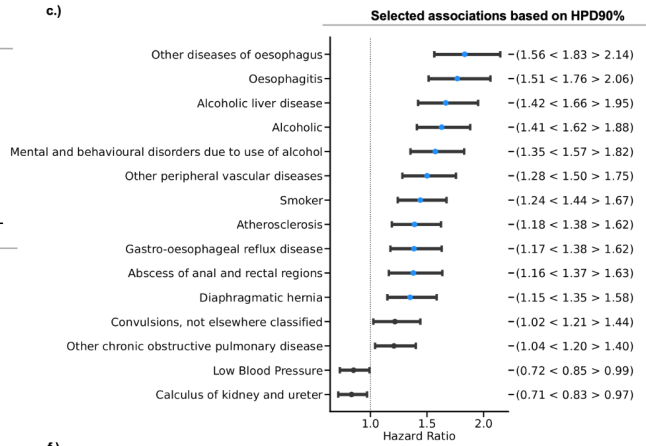

f.)

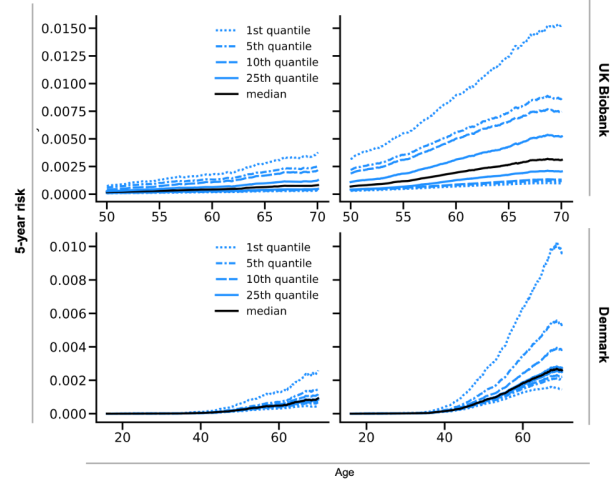

e.)

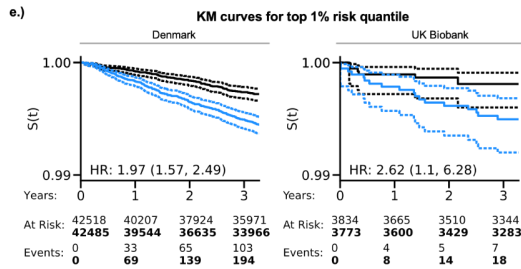

# SFC2: Stomach

## Stomach

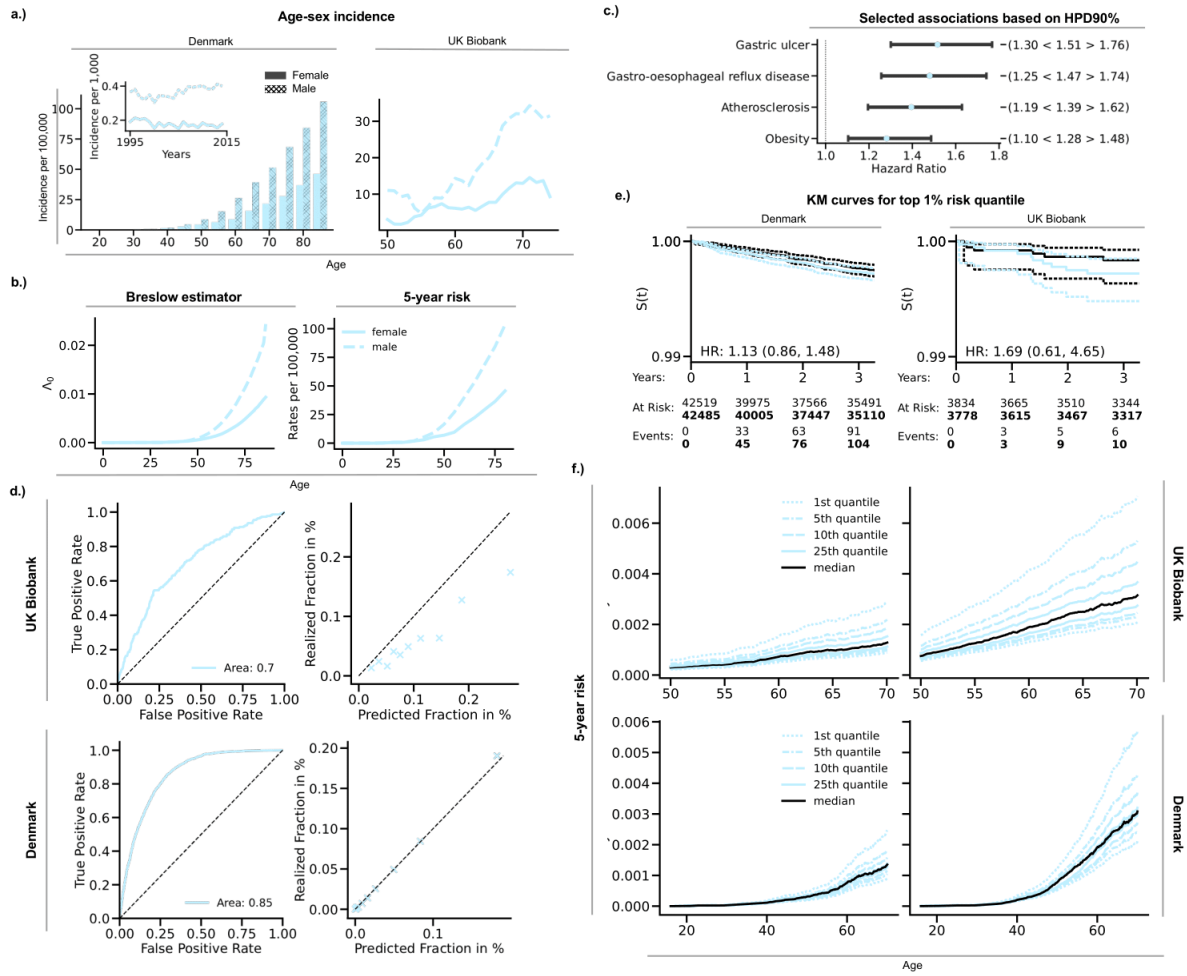

# SFC3: Colorectal

## Colorectal

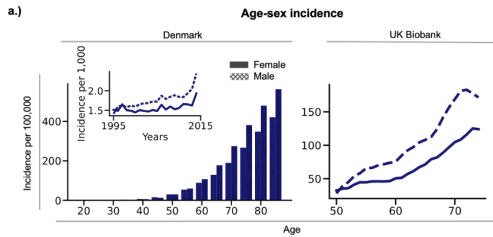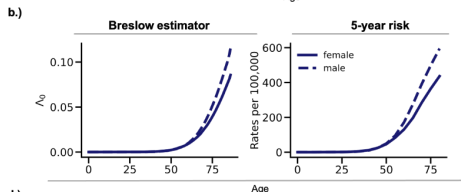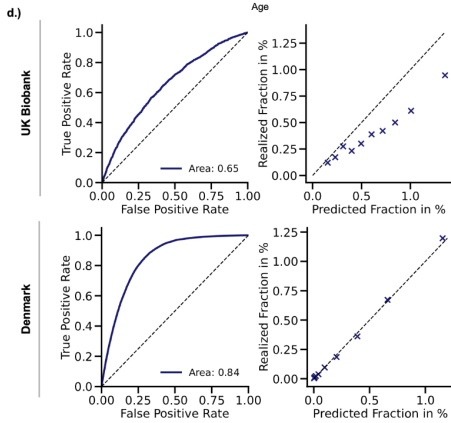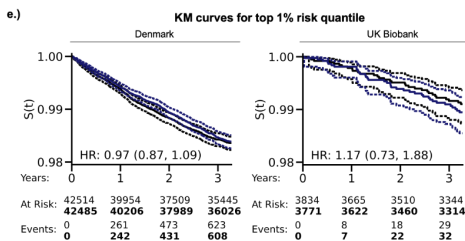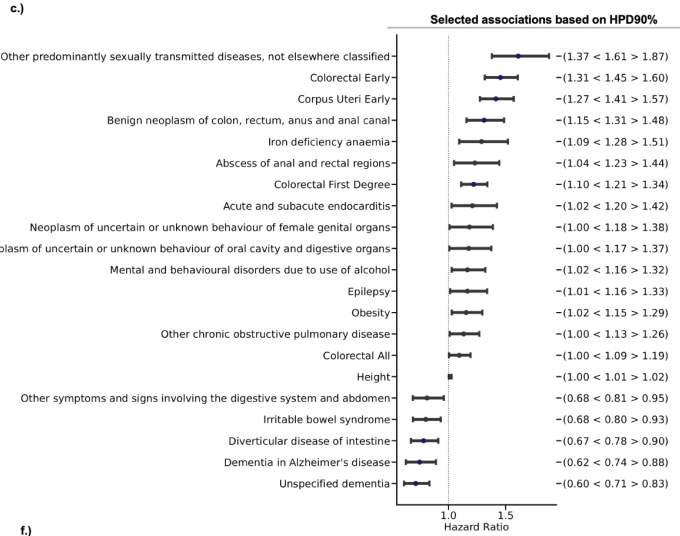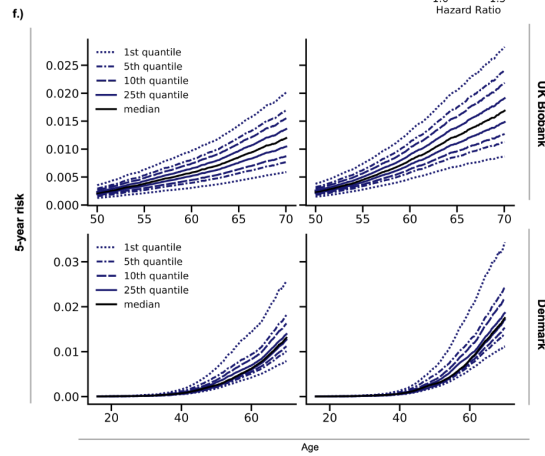



# SFC4: Liver

## Liver

a.)

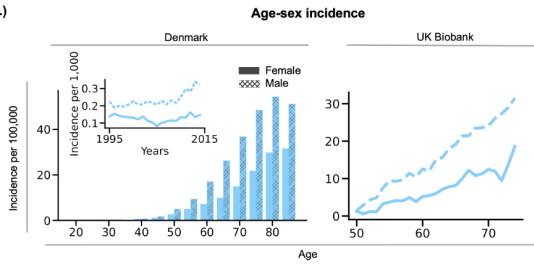

b.)

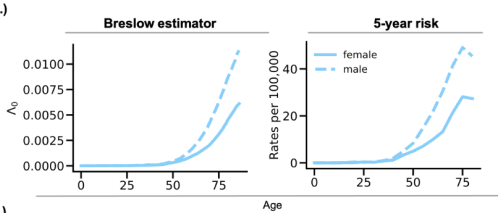

d.)

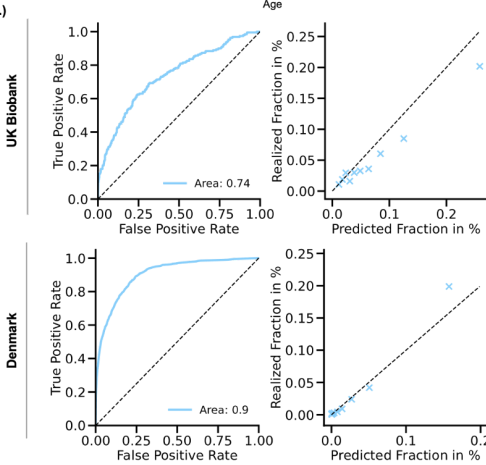

e.)

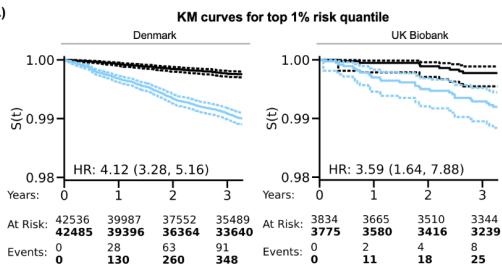

c.)

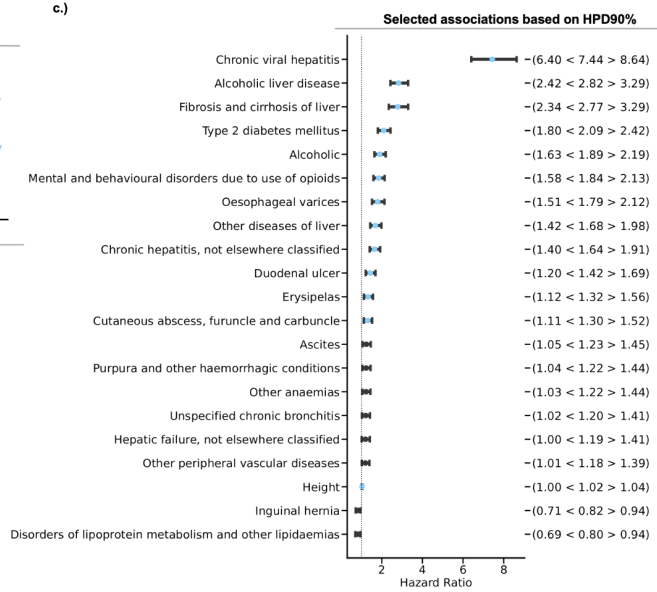

f.)

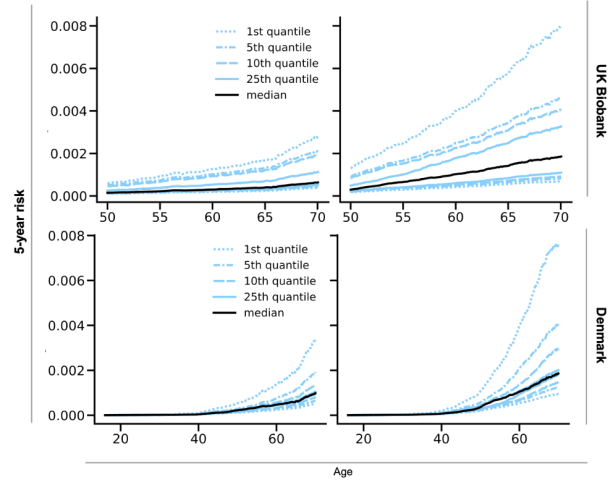

# SFC5: Pancreas

## Pancreas

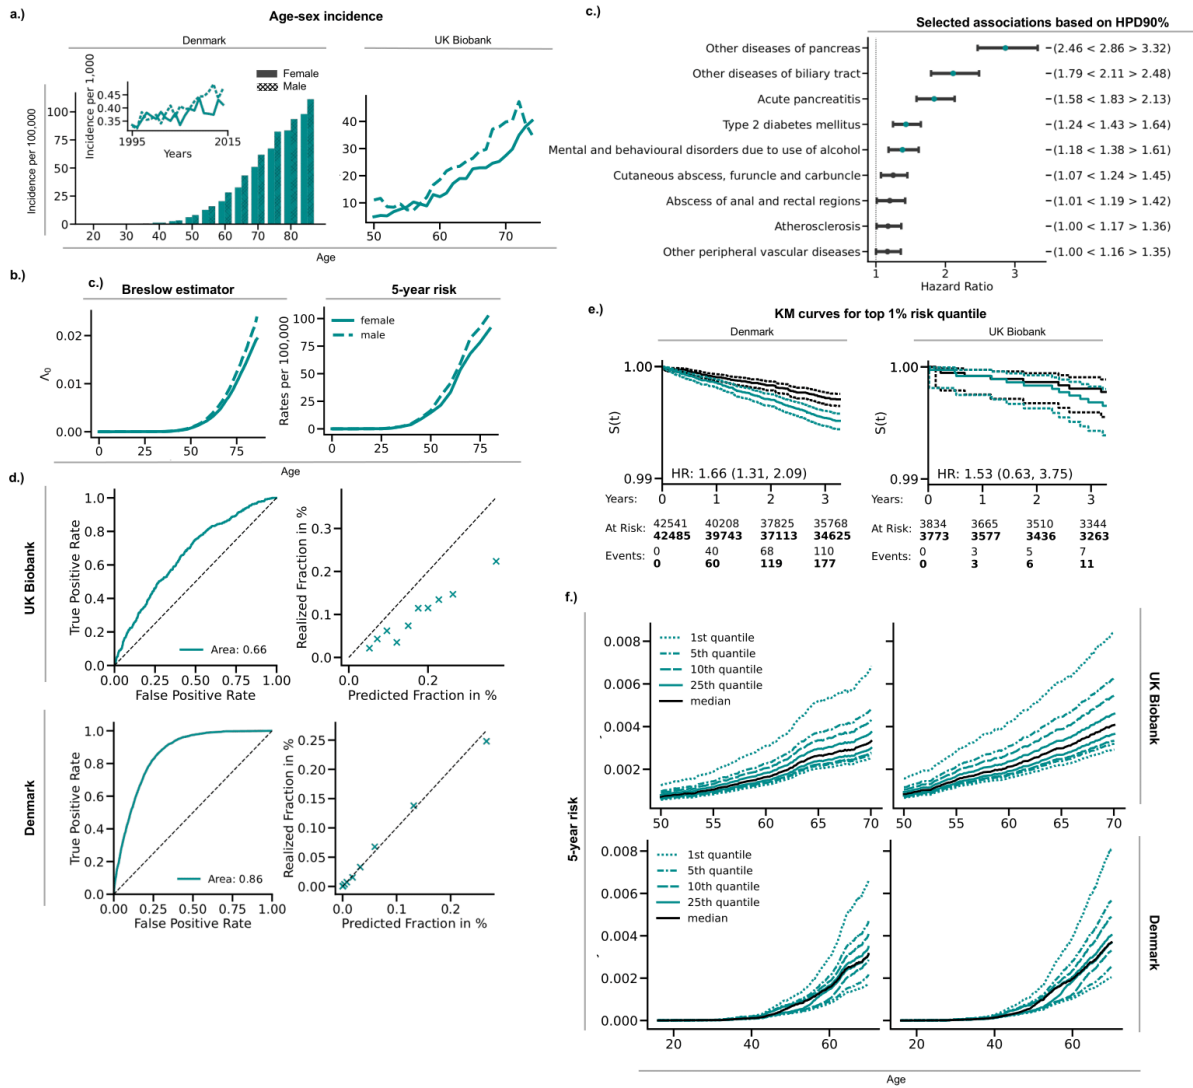

# SFC6: Lung

## Lung

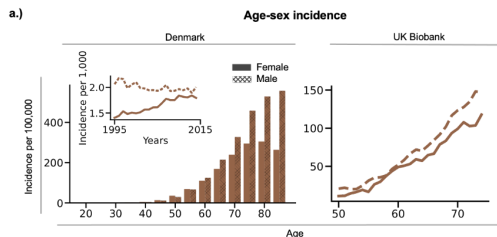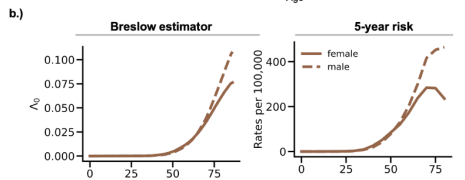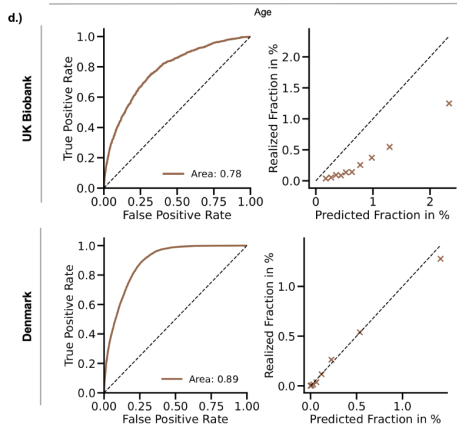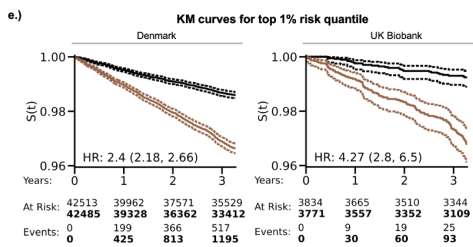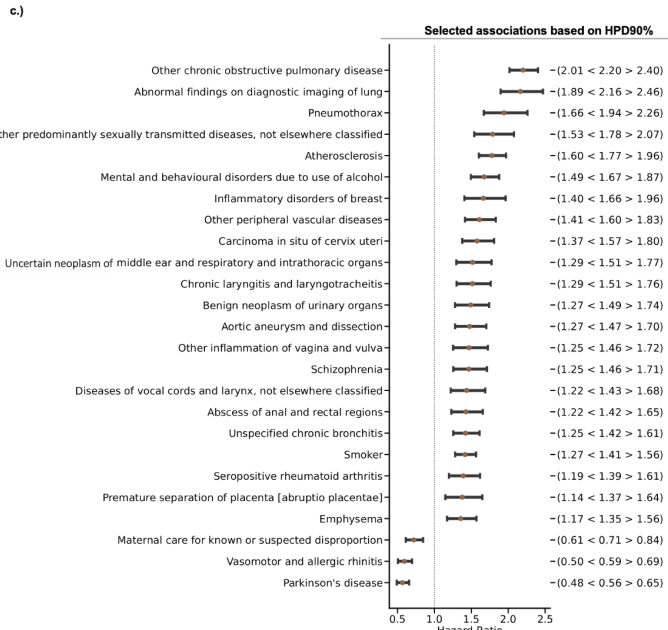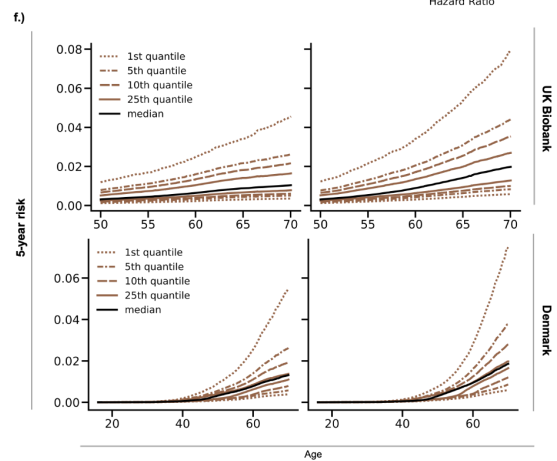

# SFC7: Melanoma

## Melanoma

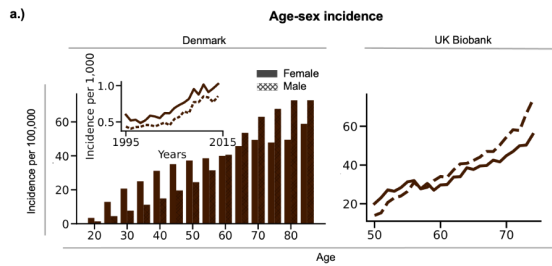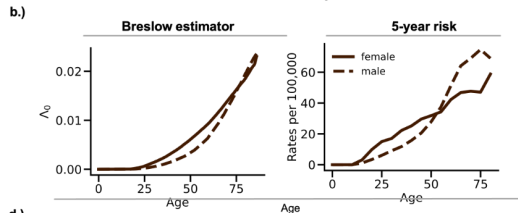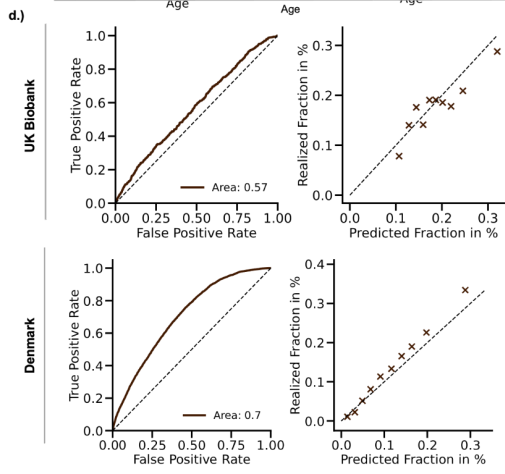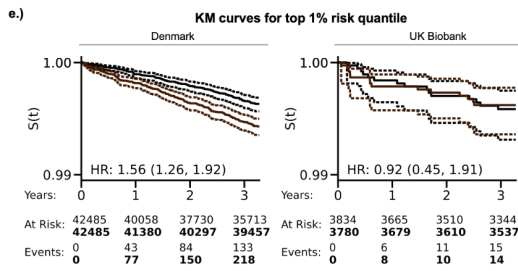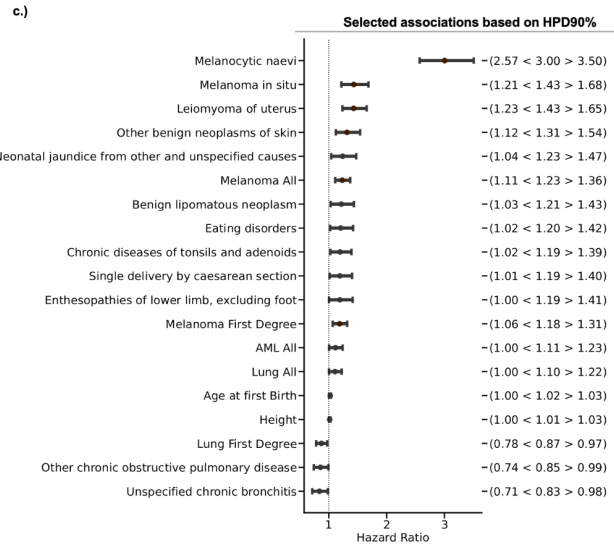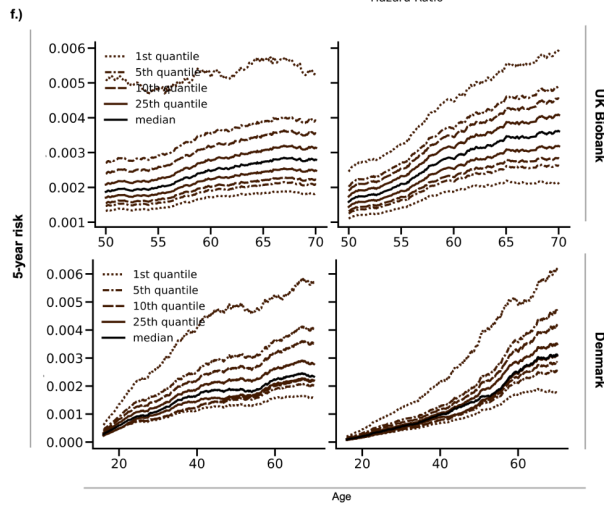

# SFC8: Breast

## Breast

a.)

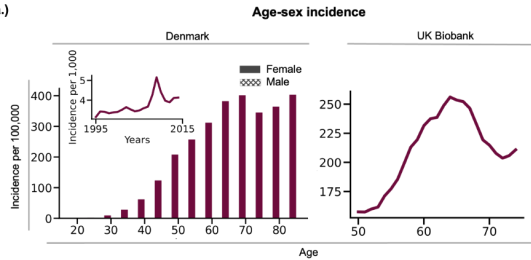

b.)

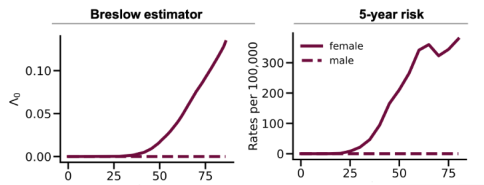

d.)

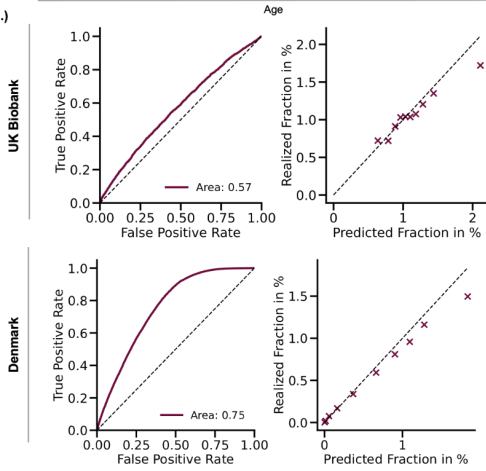

e.)

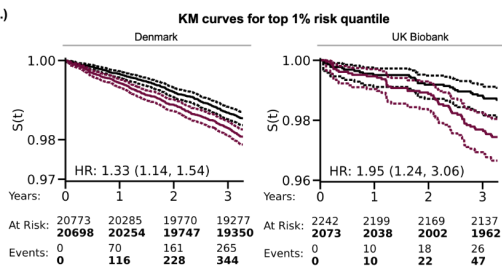

c.)

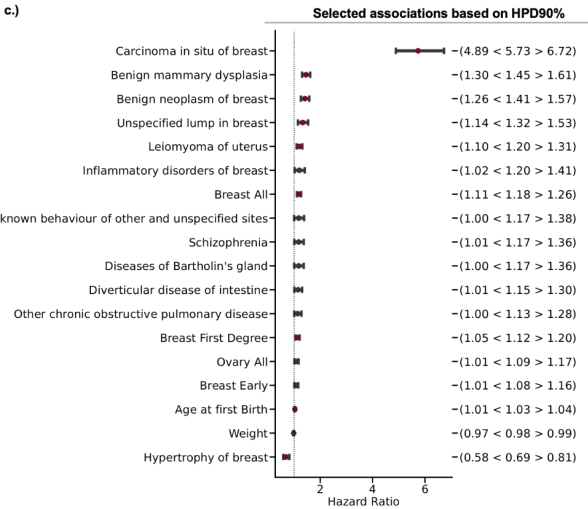

f.)

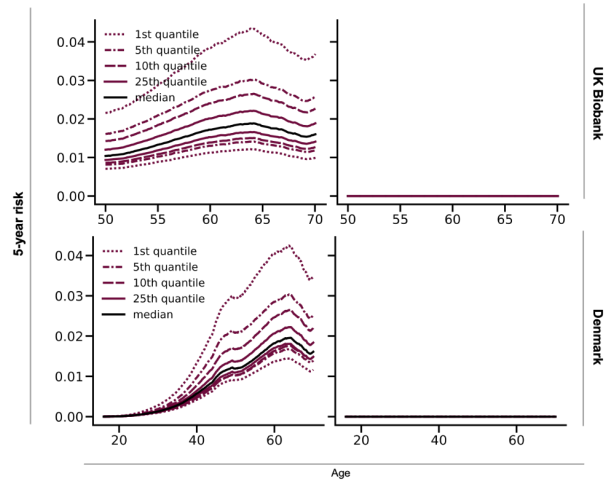

# SFC9: Cervix Uteri

## Cervix Uteri

a.)

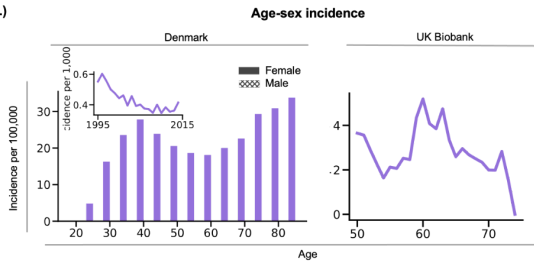

b.)

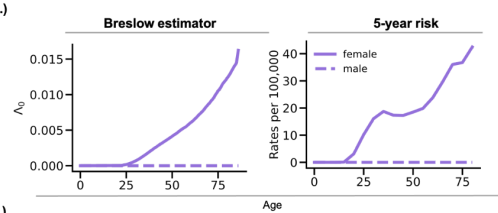

d.)

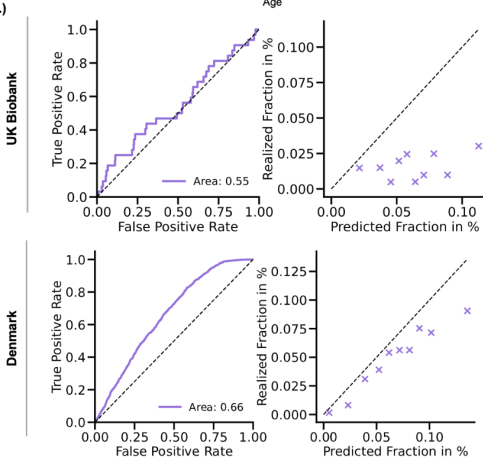

c.)

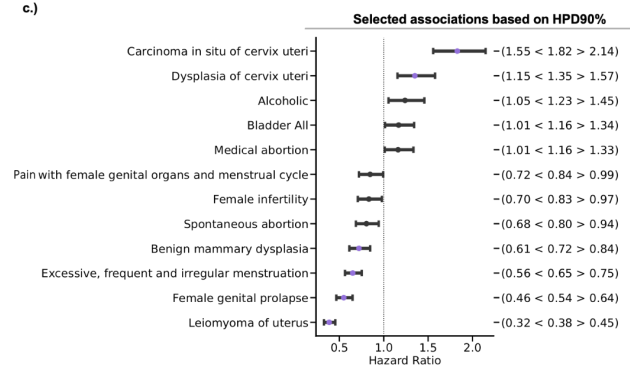

e.)

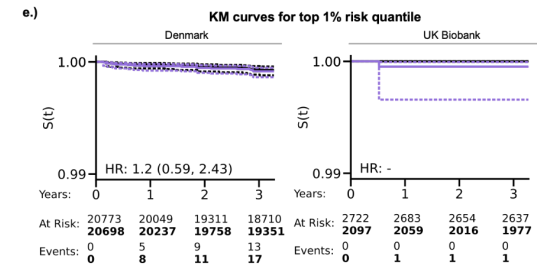

f.)

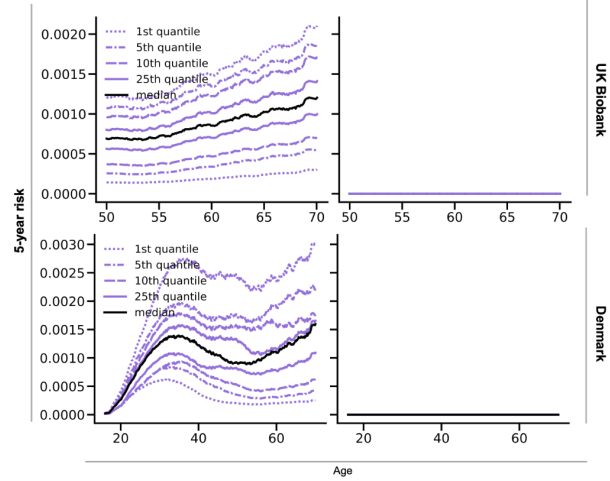

# SFC10: Corpus Uteri

## Corpus Uteri

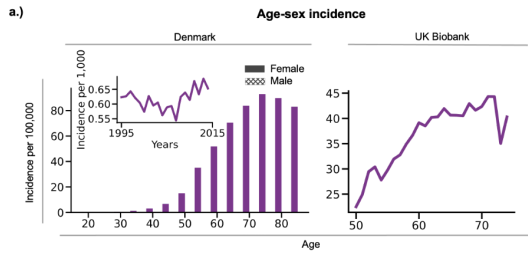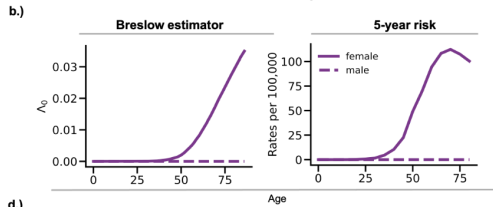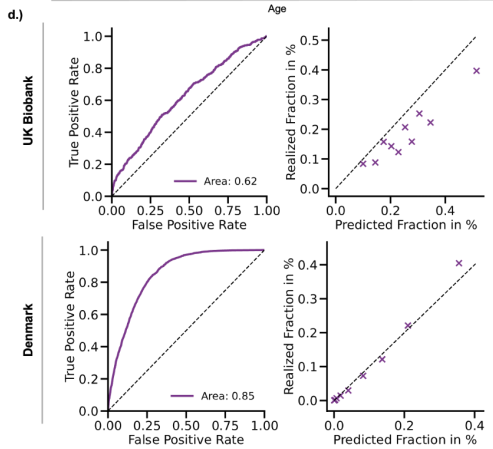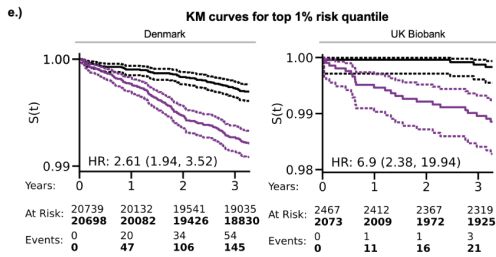

c.)

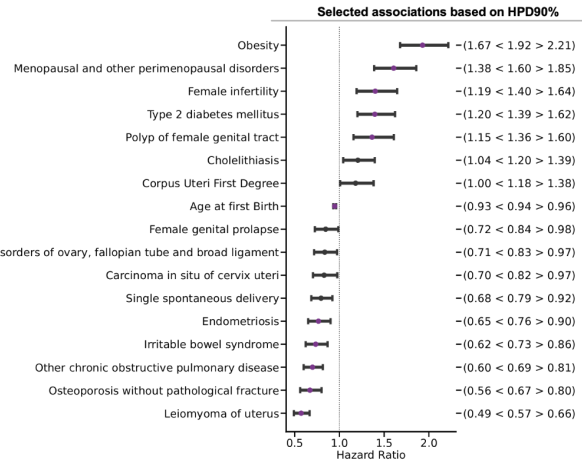

f.)

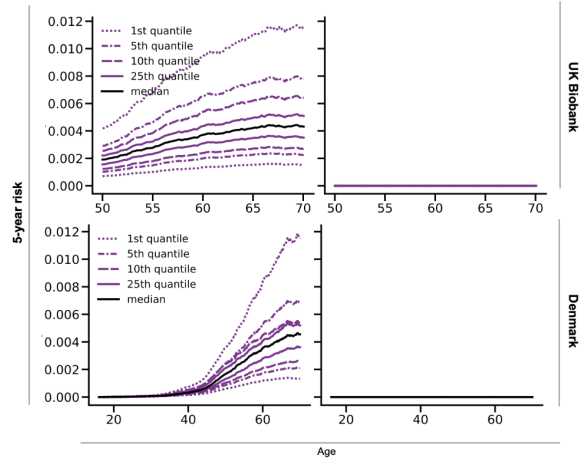



# SFC11: Ovary

## Ovary

a.)

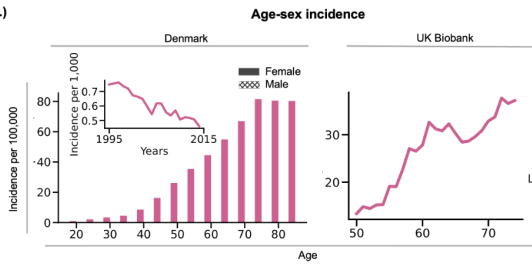

c.)

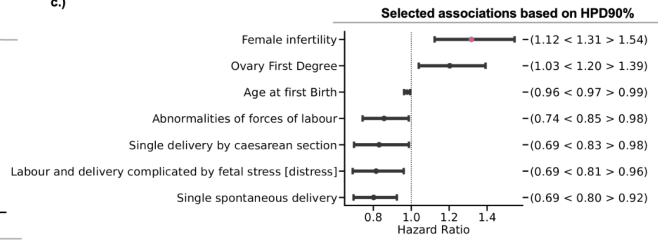

b.)

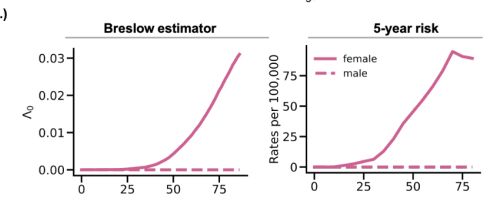

e.)

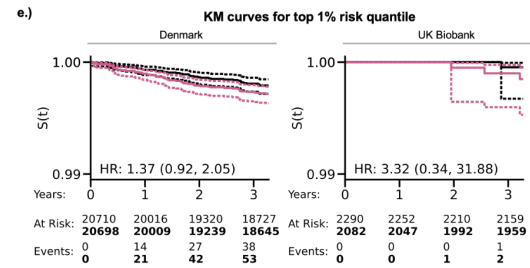

d.)

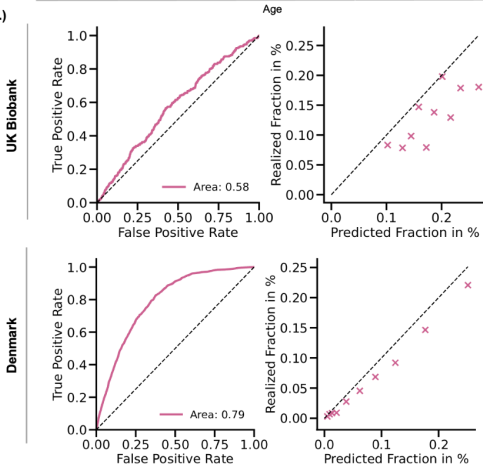

f.)

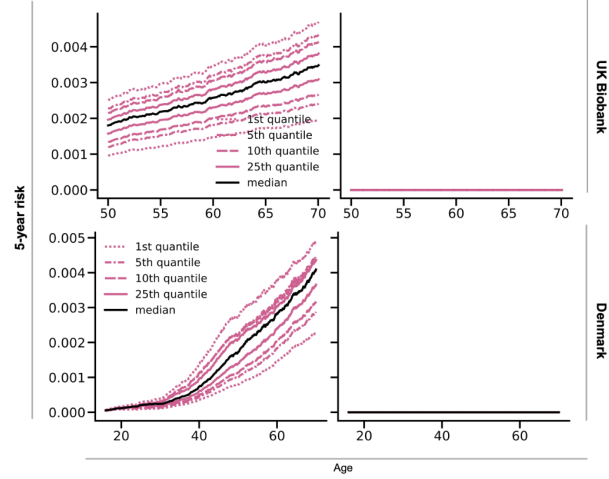

# SFC12: Prostate

## Prostate

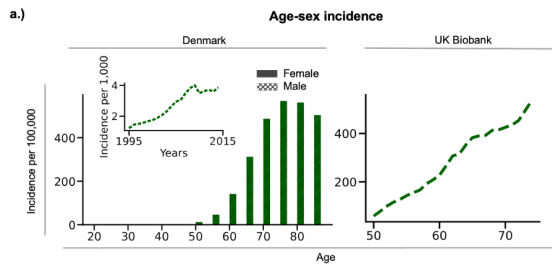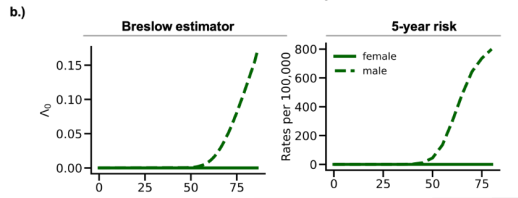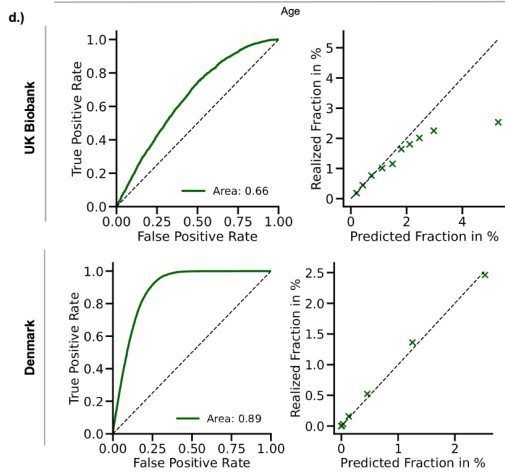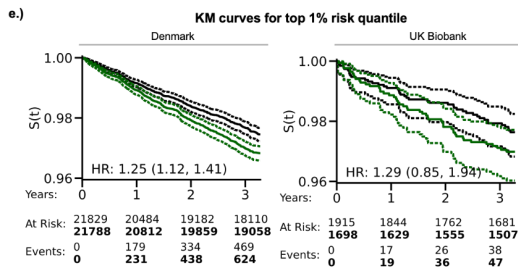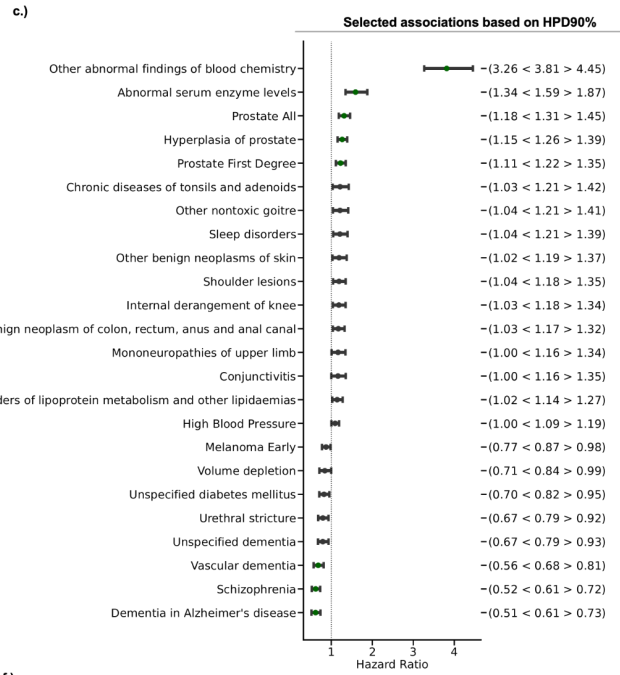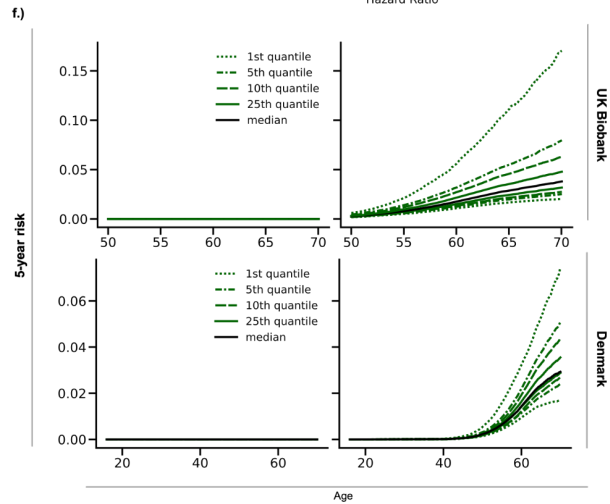

# SFC13: Testis

## Testis

a.)

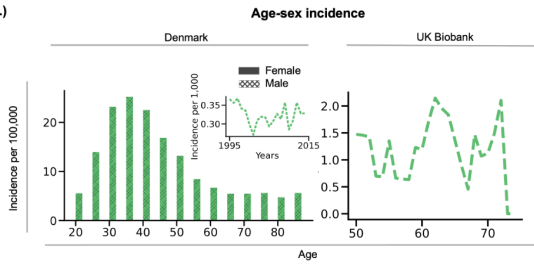

b.)

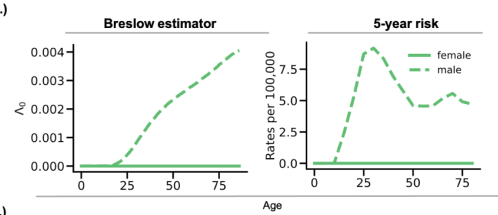

d.)

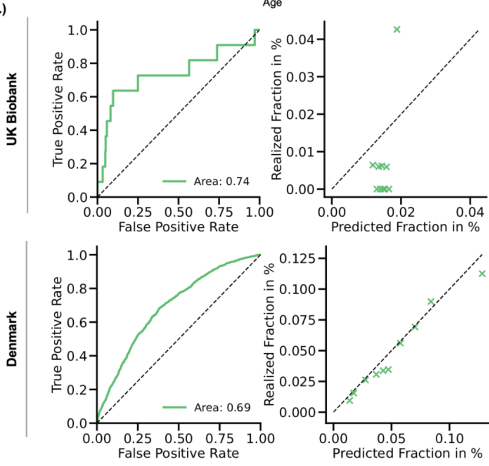

c.)

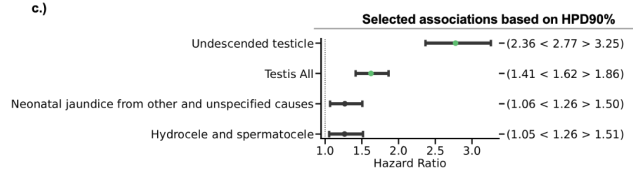

e.)

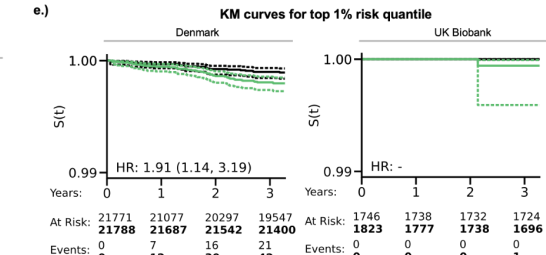

f.)

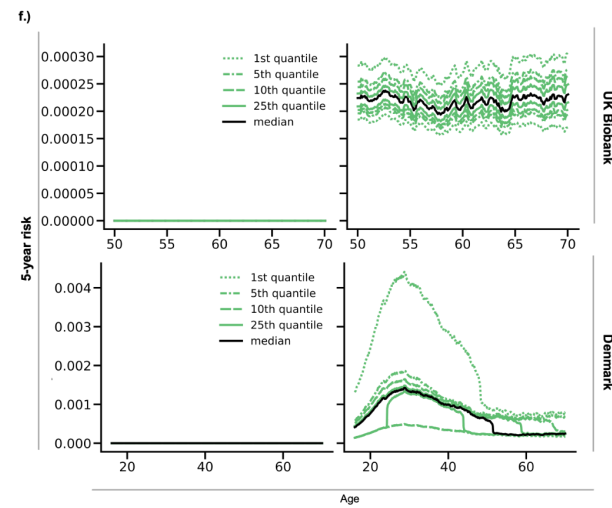

# SFC14: Kidney

## Kidney

a.)

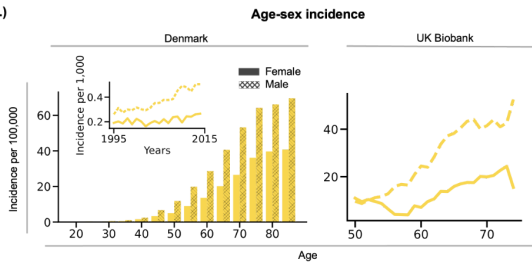

b.)

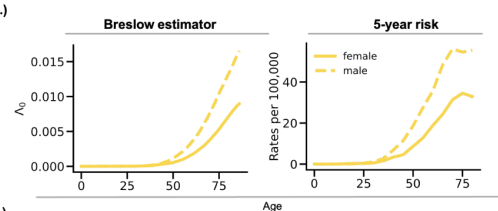

d.)

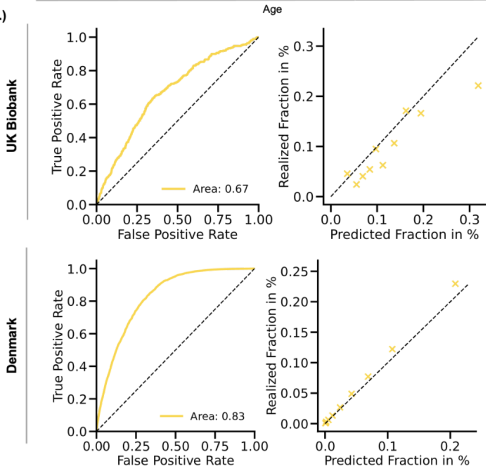

c.)

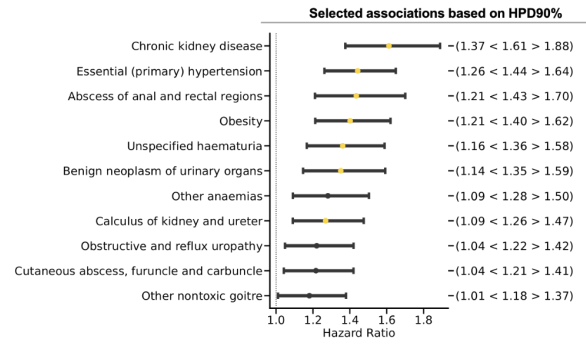

e.)

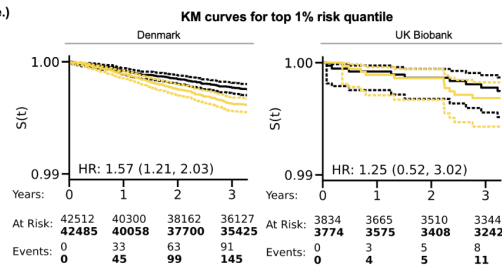

f.)

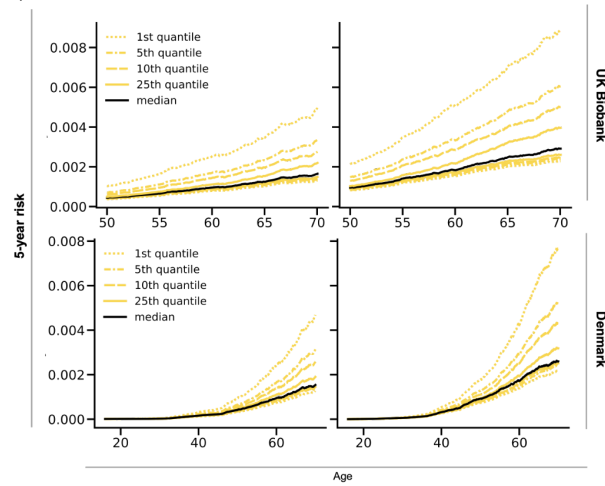

# SFC15: Bladder

## Bladder

a.)

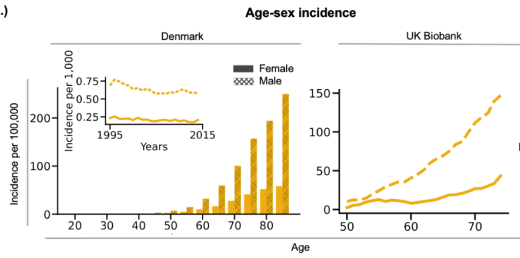

b.)

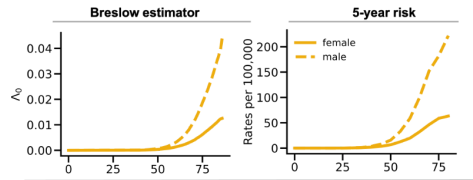

d.)

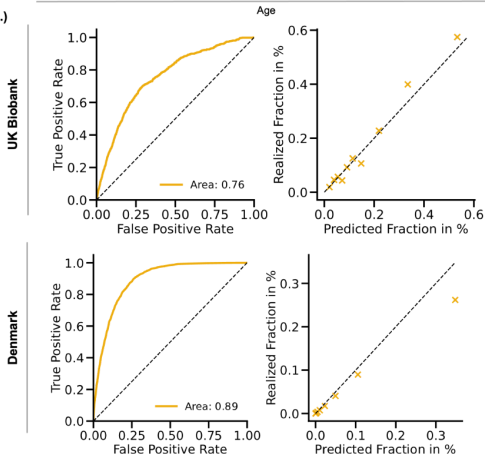

c.)

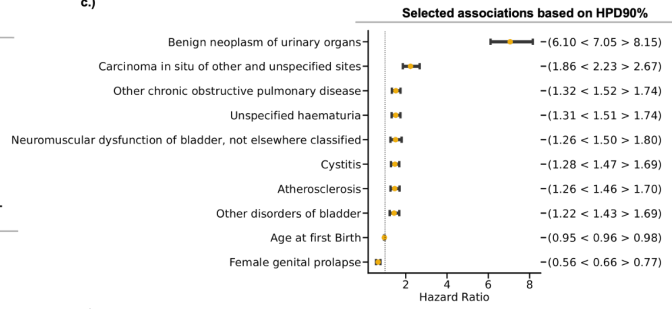

e.)

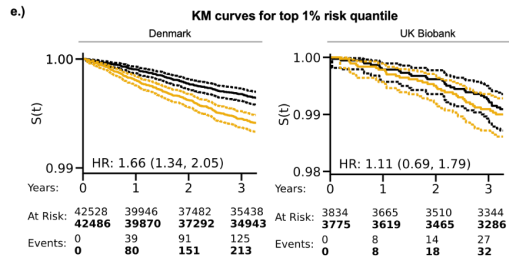

f.)

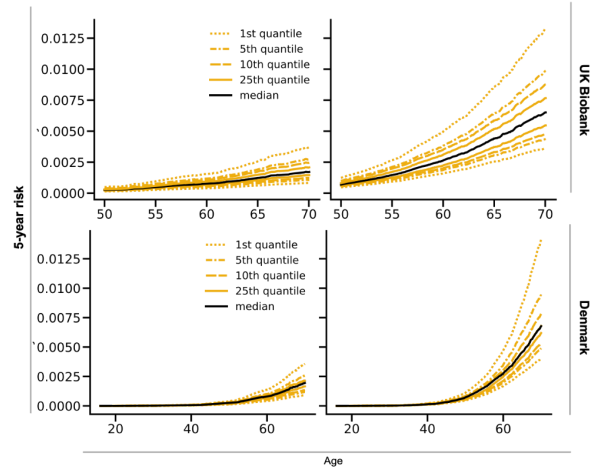

# SFC16: Brain

## Brain

a.)

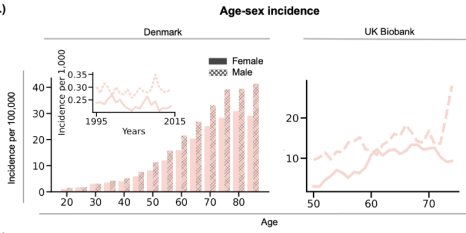

b.)

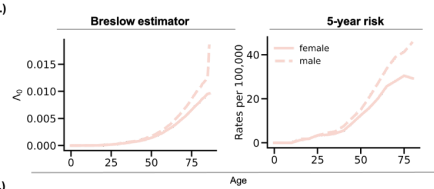

d.)

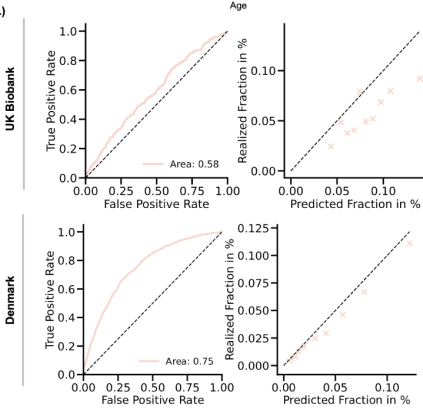

c.)

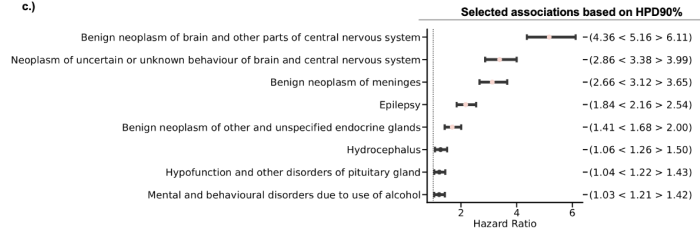

e.)

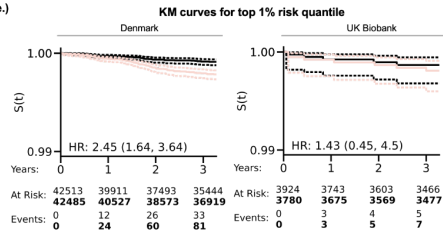

f.)

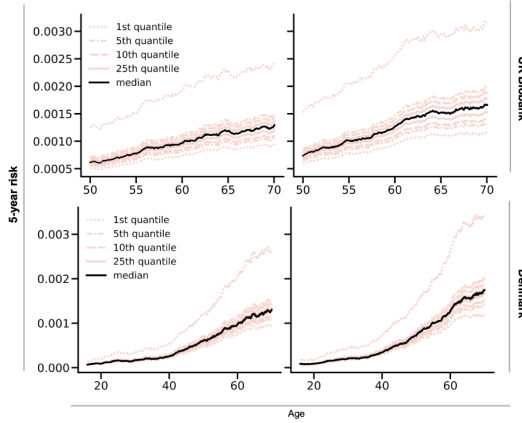

# SFC17: Thyroid

## Thyroid

a.)

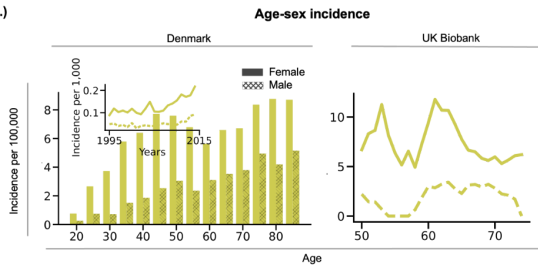

c.)

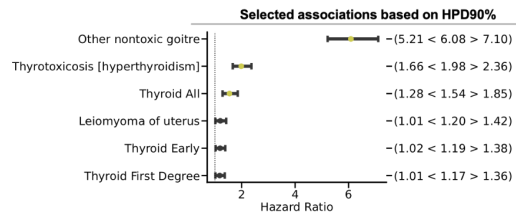

b.)

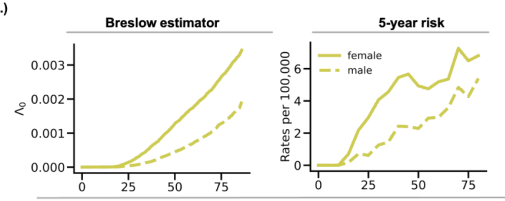

e.)

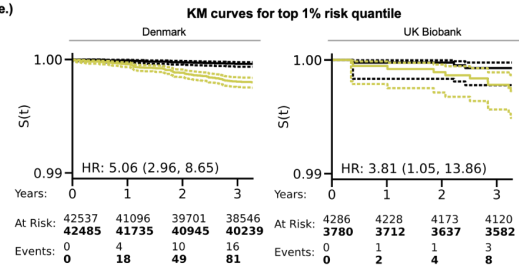

d.)

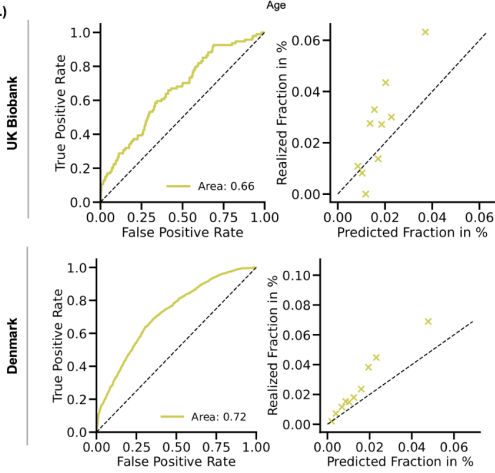

f.)

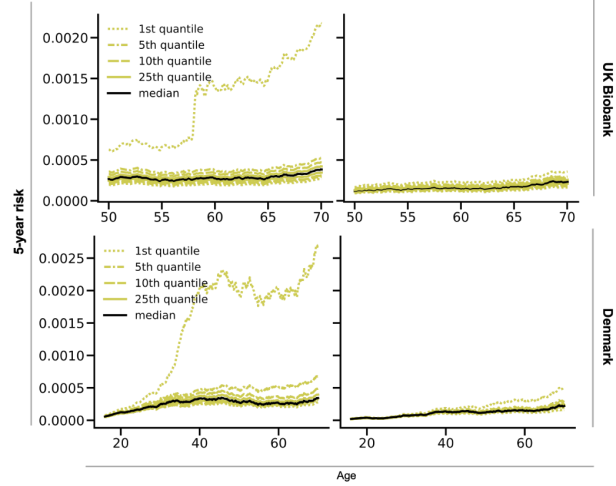



# SFC18: Non-hodgkin lymphoma

## Non-Hodgkin Lymphoma

a.)

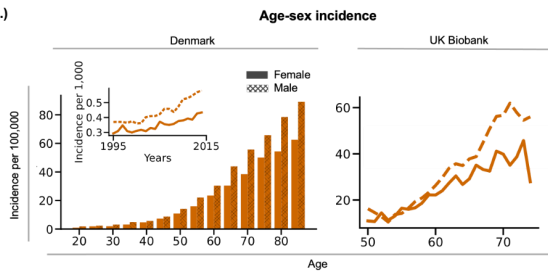

b.)

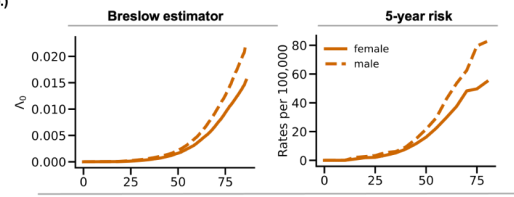

d.)

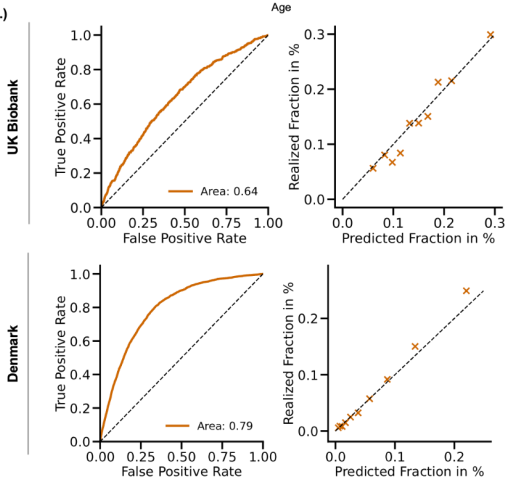

c.)

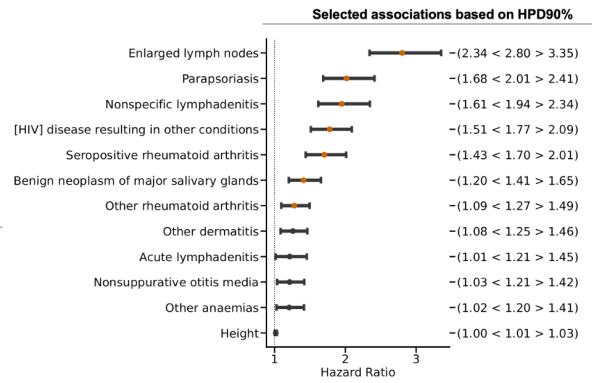

e.)

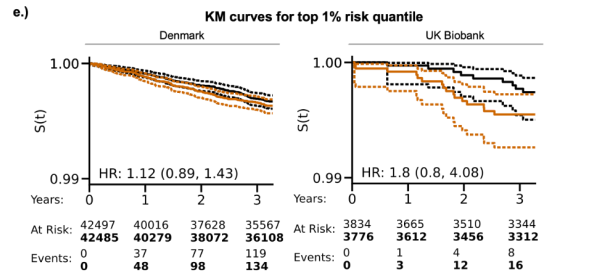

f.)

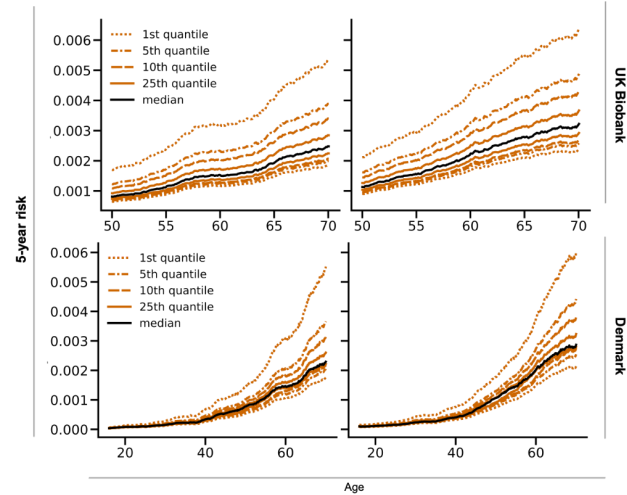

# SFC19: Multiple Myeloma

## Multiple Myeloma

a.)

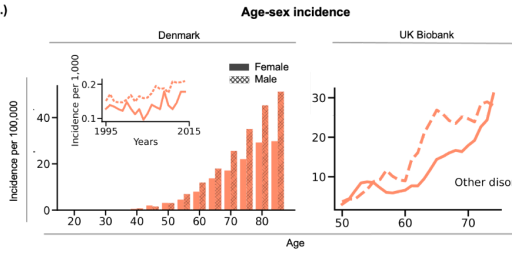

c.)

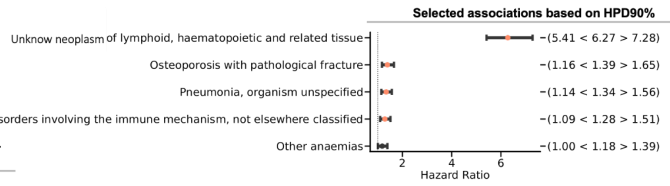

b.)

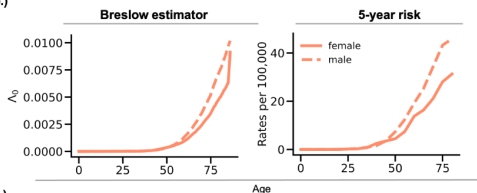

e.)

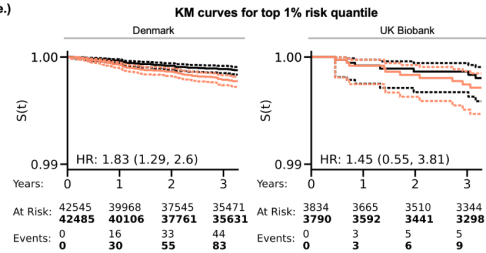

d.)

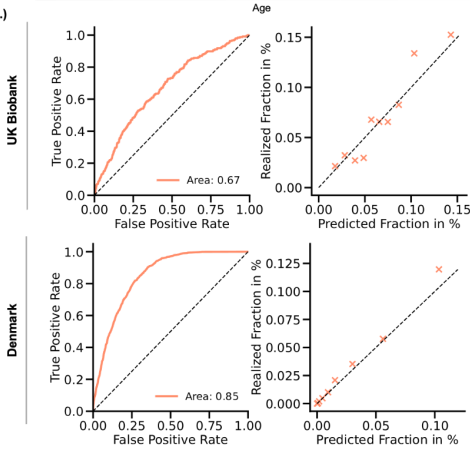

f.)

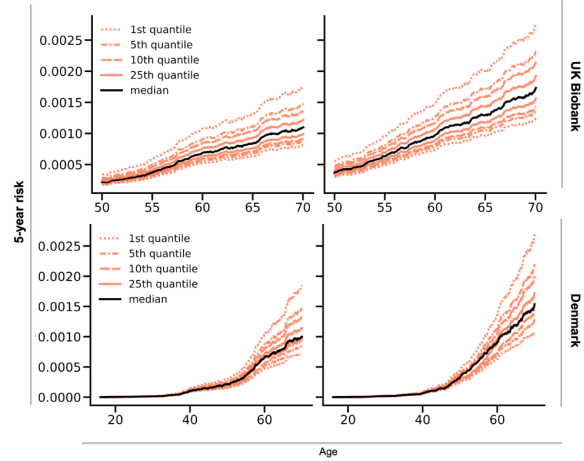

# SFC20: AML

## AML

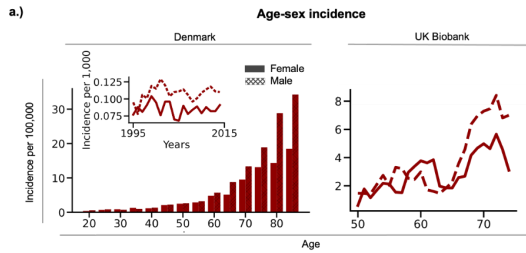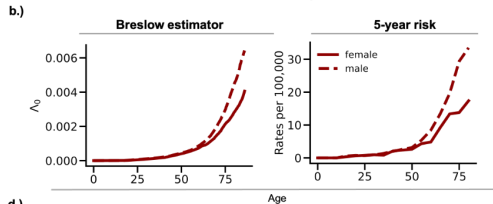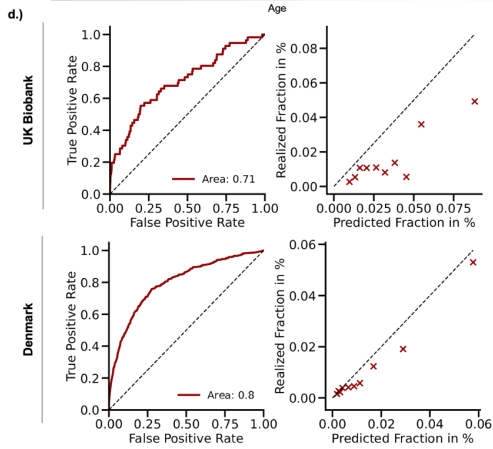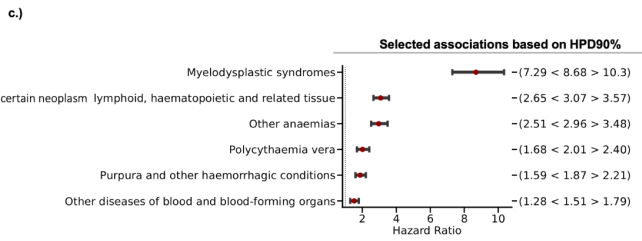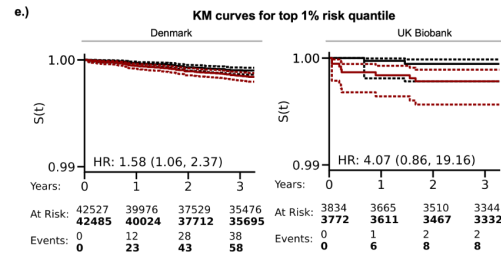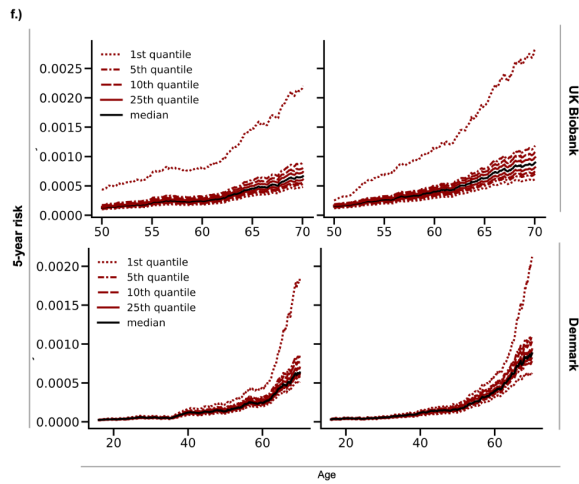

Supplement: Supplementary file [file media-1.pdf]
